# Tumor-derived exosomal circRNA\_102481 contributes to EGFR-TKIs resistance via the miR-30a-5p/ROR1 axis in non-small cell lung cancer

Bo Yang<sup>1,\*</sup>, Fei Teng<sup>2,\*</sup>, Liang Chang<sup>1</sup>, Jian Wang<sup>3</sup>, De-Long Liu<sup>1</sup>, Yong-Sheng Cui<sup>1</sup>, Guang-Hu Li<sup>1</sup>

<sup>1</sup>Department of Thoracic Surgery, The First Hospital of Jilin University, Chaoyang, Changchun, Jilin, China

<sup>2</sup>Key Laboratory for Biorheological Science and Technology of Ministry of Education, Chongqing University Cancer Hospital, Shapingba, Chongqing, China

<sup>3</sup>Department of Neurovascular Surgery, The First Hospital of Jilin University, Chaoyang, Changchun, Jilin, China

\*Co-first authors

**Correspondence to:** Yong-Sheng Cui, Guang-Hu Li; email: [yscui@jlu.edu.cn](mailto:yscui@jlu.edu.cn), [guanghu@jlu.edu.cn](mailto:guanghu@jlu.edu.cn)

**Keywords:** EGFR-TKIs resistance, exosomal, circRNA\_102481, miR-30a-5p, ROR1

**Received:** August 22, 2020

**Accepted:** February 19, 2021

**Published:** May 5, 2021

**Copyright:** © 2021 Yang et al. This is an open access article distributed under the terms of the [Creative Commons Attribution License](https://creativecommons.org/licenses/by/3.0/) (CC BY 3.0), which permits unrestricted use, distribution, and reproduction in any medium, provided the original author and source are credited.

## ABSTRACT

Exosomes are messengers for intercellular communication and signal transduction. Circular RNA (circRNA) abnormal expression and regulation are involved in the occurrence and development of a variety of tumors. In the present study, exosomes in the serum of five patients with non-small cell lung cancer (NSCLC) were isolated before and after EGFR-TKIs resistance, and the circRNA expression profile was screened using a circRNA microarray. The effects of the exosome circRNA\_102481 on cell proliferation and apoptosis were analyzed. The interaction between miR-30a-5p and circRNA\_102481 or ROR1 was predicted by starBase software, and was confirmed by RNA pull-down and dual-luciferase reporter assays. The results showed that exosomes containing circRNA\_102481 were significantly up-regulated in NSCLC with EGFR-TKIs resistance ( $p < 0.05$ ), and that circRNA\_102481 was mainly secreted by EGFR-TKIs resistance cell via exosomes ( $p < 0.05$ ). Both circRNA\_102481 silencing and si-circRNA\_102481 transported by exosomes could inhibit EGFR-TKIs resistance cell proliferation and promote cell apoptosis and circRNA\_102481 overexpression could promote EGFR-TKIs sensitive cell proliferation and inhibit cell apoptosis *in vitro* ( $p < 0.05$ ). CircRNA\_102481 served as a miR-30a-5p sponge to regulate ROR1 expression ( $p < 0.05$ ). Furthermore, the expression of circRNA\_102481 in exosomes was associated with TNM stage, tumor differentiation status, brain metastasis, and PFS and OS duration. Therefore, it was concluded that tumor-derived exosomal circRNA\_102481 could contribute to EGFR-TKIs resistance via the microRNA-30a-5p/ROR1 axis in NSCLC. Exosomal circRNA\_102481 may serve as a novel diagnostic biomarker and a therapeutic target for EGFR-TKIs resistance in NSCLC.

## INTRODUCTION

Epidermal growth factor receptor tyrosine kinase inhibitors (EGFR-TKIs) were successfully treatment for NSCLC with EGFR sensitive mutation [1], such as gefitinib, erlotinib, and afatinib, but almost all of the patients for whom the initial therapy was effective will present progress after less than 8-10 months, and produce the acquired drug-resistance [2, 3]. Although the listing of third-generation EGFR-TKIs (osimertinib) has solved resistance problem of First- and second-

generation EGFR-TKIs, there are still a large number of First- and second-generation resistant patients who cannot benefit from the treatment of osimertinib [4, 5].

Exosomes are small vesicles with a diameter of 40-100 nm, which are secreted by the body cells and released into the extracellular microenvironment, and are widely distributed in saliva, plasma, milk, urine and other body fluids [6]. Exosomes can derive from various cell types, and they constitute an important mechanism to control intercellular communication and signal transduction in

the cytoplasm, as well as transcription in the nucleus by interactions between cells, thus determining cell proliferation, migration, growth, differentiation and death [7]. Exosomes contain biological macromolecules such as RNA, protein and nucleic acid. These molecules are wrapped and protected by the lipid membrane of exosomes, which can maintain their original stability and biological functions [8]. Exosomes can enter the external environment of cells via paracrine pathways, directly stimulate target cells by acting as signal complexes, and transport organelles, proteins, nucleic acids and membrane receptors to the target cell [9]. Exosomes affect the transcription and translation of target genes, or regulate cell signaling pathways through multiple channels to affect the function and physiological state of target cells [10]. As a major pattern to maintain the exchange of materials and communication of information among organelles, exosomes can be secreted by a variety of cells, and are closely associated with tumors [11]. Furthermore, exosomal blood-based screening (liquid biopsy) is a quick and non-invasive method of evaluation with high repeatability [12].

Circular RNA (circRNA) is a novel class of non-coding RNA (ncRNA) characterized by covalently closed loops without 3' or 5'-end [13]. Due to its particular closed loop structure, circRNA is not easily degraded by endonuclease, and is stably expressed in various organisms [14, 15]. Compared with linear RNA, circRNA is more stable in nature, has more functions, is more conserved in evolution, and its number is much greater [16, 17]. CircRNA is currently the best biomarker and therapeutic target among ncRNAs [18, 19]. Therefore, exosomes containing circRNA have become a hot research topic. Recent studies [20, 21] showed that tumor-derived exosomal circRNA plays an important regulatory role in tumorigenesis, growth, invasion and metastasis. However, the role of tumor-derived exosomal circRNA on EGFR-TKIs resistance remains unclear.

In the present study, the profile of exosomes containing circRNA before and after EGFR-TKIs resistance was successfully established. In addition, tumor-derived exosomal circRNA\_102481 was identified as a key circRNA in the EGFR-TKIs resistance process. Furthermore, our results suggested that circRNA\_102481 may contribute to EGFR-TKIs resistance via the miR-30a-5p/ROR1 axis and is associated with the prognosis of NSCLC.

## **MATERIALS AND METHODS**

### **Patients enrolled**

We first collected 5 cases for exosome analysis, and then gradually increased the samples to 58 cases

(Supplementary Table 1). A total of 58 NSCLC patients treated with EGFR-TKIs (gefitinib or erlotinib) were enrolled in our study from September 2017 to March 2019 (Supplementary Table 2). According to the National Comprehensive Cancer Network (NCCN) guidelines, patients with EGFR sensitive mutation and those with objective response or stable disease to EGFR-TKIs treatments were regarded as EGFR-TKIs sensitive patients. Patients who suffered progressive disease or recurrent disease within 6 months were classified as EGFR-TKIs resistance patients. Serum exosomes of 58 NSCLC patients were extracted before and after EGFR-TKIs resistance. The subject was informed and approved by medical ethics committee of the first hospital of Jilin University. Specimens were selected for the patient's 'consent in advance and informed consent forms were signed.

### **Cell lines**

The gefitinib sensitive cell lines PC9 and the corresponding gefitinib resistant cell lines PC9/GR, the erlotinib sensitive cell lines HCC827 and the corresponding erlotinib resistant cell lines HCC827/ER were purchased from the Cell Bank of the Chinese Academy of Sciences. The cells after resuscitation were cultured in high glucose DMEM medium, containing 10% fetal bovine serum and incubated at a constant incubator at 37° C, 5% CO<sub>2</sub>. All the tissues used in the experiments were informed and approved by ethics committee of the first hospital of Jilin University.

### **Extraction and identification of exosomes**

Exosomes in serum and medium were isolated by the ExoQuick method. Centrifuge the sample at 3,000×g for 15 minutes and take the supernatant. After filtering with 0.22-mm PVDF filter, add the precipitant, mix and shake, store in a refrigerator at 4° C for 30 minutes, and centrifuge at 1,500×g for 5 minutes. Discard the supernatant Precipitate in 100 ML PBS and place in a constant temperature refrigerator at 80° C. Exosomes were collected from the pellet and re-suspended in PBS. The exosomes morphology was observed under a transmission electron microscope (TEM). The size distribution and concentration of exosomes were analyzed by nanoparticle-tracking analysis. The exosomal-related marker protein of CD63 and TSG101 were detected by western-blotting assay.

### **circRNA microarray**

The exosomes RNA of five pair's samples were extracted using RNeasy Mini Kit (Qiagen, Hilden, Germany) according to the manufacturer's protocol. Sample labeling and array hybridization were

performed. Total RNAs were treated with RNase R to remove linear RNAs and quantified and quality was verified using NanoDrop® ND-1000 UV-Vis Spectrophotometer (NanoDrop, Wilmington, DE, USA). The enriched circRNAs were amplified and transcribed into cDNA. Lastly, the circRNA profile was measured using Arraystar high-throughput human circRNA microarray V2.0 (8×15 K, Arraystar, Inc.). CircRNAs with  $\geq 2.0$  fold-changes (FC) and  $p < 0.05$  were selected as circRNAs with significant differential expression.

### Quantitative real-time PCR

The exosomes RNA of five pair's samples were isolated with Trizol reagent kit. 5  $\mu\text{g}$  of tRNA were used for reverse transcription with First Strand cDNA Synthesis Kit in qRT-PCR system. The PCR system reaction were at 95° C for 15min, followed by 40 cycles at 94° C for 15s, and 20 cycles at 55° C for 30s and 20 cycles at 70° C for 30s were performed. The relative expression levels were calculated by using the  $2^{-\Delta\Delta\text{Ct}}$  method.  $\Delta\text{Ct} = \text{Ct}_{\text{target}} - \text{Ct}_{\text{U6}}$ . The qPCR primers were designed using Primer Premier Software (version 5; Premier Biosoft International). The forward (F) and reverse (R) sequence of hsa\_circRNA\_102481, hsa\_circRNA\_063313, hsa\_circRNA\_103827, hsa\_circRNA\_405296, hsa\_circRNA\_000367, hsa\_circRNA\_406587, miR-30a-5p, ROR1 mRNA and U6, GAPDH (control sequence) were shown in Table 1.

### Cell transfection

Small interfering RNA (siRNA/si) targeting circRNA\_102481 (si-circRNA\_102481) and corresponding control (si-NC) labeled with a green fluorescent protein (GFP), miR-30a-5p mimics, miR-30a-5p inhibitor and its matched control (miR-30a-5p NC) were transfected using Lipofectamine<sup>TM3000</sup> reagent (Invitrogen Co. Ltd, USA) according to the manufacturer's instruction. The transfection efficiency was observed under a confocal laser scanning microscope and verified using RT-qPCR after 48 h transfection.

### MTT assay

After 48 h transfection, cells in logarithmic growth phase were seeded into 96-well culture dish and cultured with different doses gefitinib (0.0, 0.25, 0.5, 1.0, 2.0, 4.0, 8.0, 16.0  $\mu\text{mol/L}$ ) or erlotinib (0.0, 0.5, 1.0, 2.0, 4.0, 8.0, 16.0, 32.0  $\mu\text{mol/L}$ ) in the 37° C, 5% CO<sub>2</sub> incubator. After cultured for 48 h, A549/PTX and H292/PTX cells in each group were incubated with 20  $\mu\text{l}$  of 5.0 mg/ml 3-(4,5-Dimethylthiazol-2-yl)-2,5-diphenyltetrazolium bromide (MTT) for 4 h and 100  $\mu\text{l}$

of dimethyl sulfoxide (DMSO) for 30 min. The absorbance (OD) at 490 nm was measured by a micro plate reader.

### Annexin V-FITC/PI assay

After 48 h transfection, cells in logarithmic growth phase were seeded into 6-well culture dish and cultured with 2  $\mu\text{mol/L}$  gefitinib or 4  $\mu\text{mol/L}$  erlotinib in the 37° C, 5% CO<sub>2</sub> incubator. After cultured for 48 h, cells in each group were subsequently incubated with 5  $\mu\text{l}$  Annexin V combined Fluorescein isothiocyanate (FITC) and 5  $\mu\text{l}$  Propidium Iodide (PI) solutions at 37° C for 20 min in the dark. The apoptotic cells were measured using flow cytometer (BD Biosciences Co. Ltd, USA).

### Dual-luciferase reporter assay

The firefly luciferase reporter plasmid psiCHECK2 with circRNA\_102481-3'UTR or ROR1-3'UTR containing the wide type sequences (wt) or mutant sequences (mut) were co-transfected with miR-30a-5p mimic or miR-30a-5p NC into PC9/GR and HCC827/ER cells using Lipofectamine<sup>TM3000</sup> reagent for 48h. The Firefly and Renilla luciferase activity was detected by a Dual-Luciferase Reporter Assay System, with Renilla luciferase as normalized control.

### Western blot

After 48 h transfection, cells in logarithmic growth phase were digested and total proteins were collected. 50  $\mu\text{g}$  isolated protein were separated by 10% polyacrylamide gel electrophoresis and transferred to PVDF membrane, and blocked with 5% non-fat milk for 1 h. Then, the membranes were incubated with primary Anti-ROR1 antibody (1:1000 dilution, catalogue number: ab5073, Abcam Co. Ltd, USA) for 4 h at 37° C and followed by horseradish peroxidase (HRP)-conjugated secondary antibodies. Protein bands were visualized using the Pierce enhanced chemiluminescent (ECL) system.

### Statistical analysis

GraphPad Prism 8.1 (GraphPad Software Company, San Diego, CA, USA) and SPSS 18.0 statistical software (SPSS Inc., Chicago, IL, USA) was used for the statistical analysis. The data are expressed as the mean  $\pm$  SD. Statistical differences between two groups were determined using an unpaired Student's t-test or an  $\chi^2$ -test, whereas statistical differences between  $>2$  groups were analyzed using a one-way analysis of variance, followed by Tukey's multiple comparison test. Fisher exact and  $\chi^2$  tests were used to compare

**Table 1. The RT-qPCR primers sequences.**

| Items              |   | Sequences                    |
|--------------------|---|------------------------------|
| hsa_circRNA_102481 | F | 5'-ACATCCACAATGGCACTGA-3'    |
|                    | R | 5'-AGGAGGAGATGAGTTGGAA-3'    |
| hsa_circRNA_063313 | F | 5'-AAAACACTGTTGACAATAA-3'    |
|                    | R | 5'-TGGCTCCTACCAGAGAGCT-3'    |
| hsa_circRNA_103827 | F | 5'-CATAGCAACTGAGGGCTT-3'     |
|                    | R | 5'-GCAACATGCCTATGATTT-3'     |
| hsa_circRNA_405296 | F | 5'-CGCACACCATCATGCCCAGA-3'   |
|                    | R | 5'-ATCTATAGAGAAAATGGAATC-3'  |
| hsa_circRNA_000367 | F | 5'-GTCCAGGTCCATTCCA-3'       |
|                    | R | 5'-TAACTGGTCCCAGTAAGCA-3'    |
| hsa_circRNA_406587 | F | 5'-TGCCAAGTCAGGGGAGAGG-3'    |
|                    | R | 5'-TCCTTGAACTCCACTGATACTT-3' |
| hsa_miR-30a-5p     | F | 5'-GAAGGUCAGCUCCUACAAAUGU-3' |
|                    | R | 5'-UUAGUCAGAGUAACGAAAUUU-3'  |
| ROR1 mRNA          | F | 5'-TGCCAGCCCAGTGAGTAATCT-3'  |
|                    | R | 5'-GCCAATGAAACCAGCAATCTG-3'  |

categorical variables. Continuous variables were compared using the Wilcoxon rank-sum test or Kruskal-Wallis test. OS durations between groups were compared using the Kaplan-Meier method and log-rank test.  $p < 0.05$  was considered statistically significant difference.

## RESULTS

### Identification of exosomes

The serum exosomes of five paired samples were isolated by the ExoQuick method. The exosomes morphology was observed under a transmission electron microscope, which revealed that the exosomes were regular, and the majority of them round, elliptical or disc-shaped vesicles with a uniform size. In addition, a lipid membrane was observed around the exosomes (Figure 1A). Western blot analysis confirmed that exosomal markers, including CD63 and TSG101 proteins, were highly expressed in exosomes (Figure 1B). These results indicated that exosomes were successfully isolated from samples' serum.

### Successful establishment of exosomal circRNA expression profile

The exosomes RNA of five pair's samples was extracted using RNeasy Mini Kit (Qiagen GmbH) and the circRNA profile was measured using Arraystar high-throughput human circRNA microarray V2.0 (8x15 K; Arraystar,

Inc.). Scatter plot Supplementary Figure 1A was used for assessing the variation or reproducibility of circRNA expression. The values of the x and y axes in the scatter plot correspond to the normalized signals of the samples (log<sub>2</sub> scaled). Volcano plots Supplementary Figure 1B were constructed using fold-change and P-values for visualizing differential expression between two different conditions. The volcano plots and scatter plots showed that the differences in circRNA expression were variable.

### circRNA\_102481 is significantly up-regulated in serum exosomes of patients with EGFR-TKIs resistance

Through standardization of data processing and analysis, hierarchical clustering analysis (Figure 2A) showed the top 10 most increased circRNAs in serum exosomes of patients with EGFR-TKIs resistance compared with EGFR-TKIs-sensitive patients. In addition, reverse transcription-quantitative (RT-qPCR) analysis confirmed that hsa\_circRNA\_102481, hsa\_circRNA\_063313 and hsa\_circRNA\_103827 were significantly up-regulated, while hsa\_circRNA\_405296, hsa\_circRNA\_000367 and hsa\_circRNA\_406587 were obviously down-regulated in serum exosomes of EGFR-TKIs-resistant patients (Figure 2B;  $p < 0.05$ ). Our results illustrated that circRNA microarray analysis data were consistent with the RT-qPCR results regarding the expression levels of the aforementioned six circRNAs.

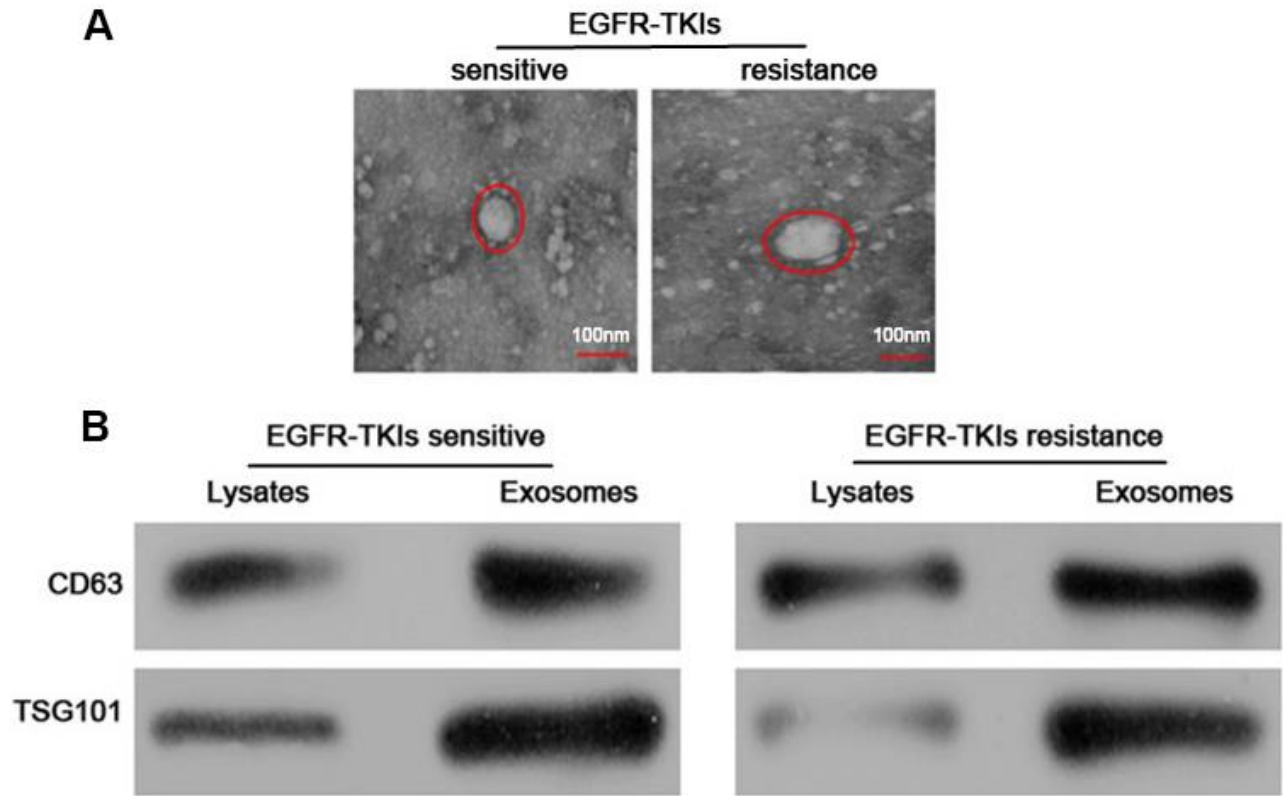

**Figure 1. Identification and characterization of serum exosomes.** (A) Representative electron micrographs of serum exosomes obtained by TEM analysis (right, bars=100 nm). (B) Western blots analysis of exosomal markers, including CD63 and TSG101 in exosomes and cell lysates.

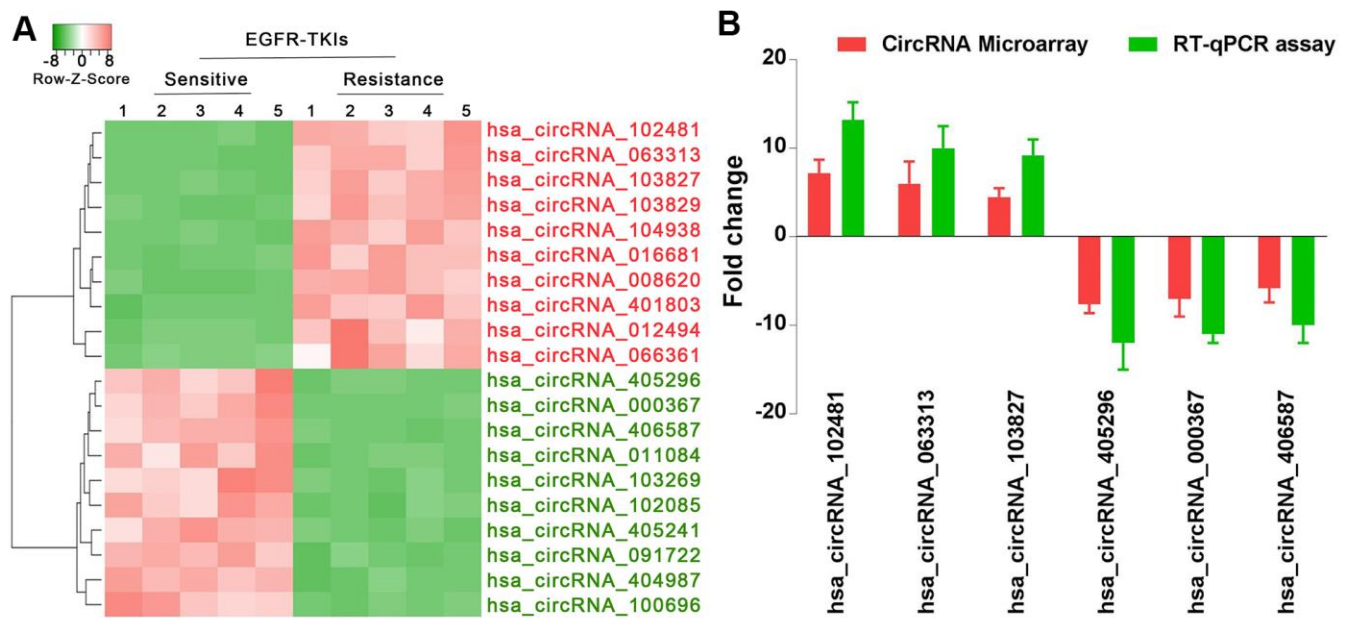

**Figure 2. circRNA\_102481 is significantly up-regulated in serum exosomes of patients with EGFR-TKIs resistance.** (A) Hierarchical clustering analysis showed the top 10 most increased and increased circRNAs in serum exosomes. (B) RT-qPCR validation.

Among them, circRNA\_102481 showed the highest up-regulation (it was significantly up-regulated by 7.2 fold) in serum exosomes of EGFR-TKIs-resistant patients.

### Exosomal circRNA\_102481 derives from EGFR-TKIs-resistant cells

Exosomes can derive from various types of cells. In order to demonstrate whether exosomal circRNA\_102481 derived from EGFR-TKIs-resistant cells, the EGFR-TKIs-resistant PC9/GR and HCC827/ER cell lines were selected as cell models for further verification. RT-qPCR assay showed that circRNA\_102481 was up-regulated in EGFR-TKIs resistant cells (PC9/GR and HCC827/ER) compared with its expression level in sensitive cells (PC9 and HCC827) (Figure 3A, 3B;  $p < 0.05$ ). Exosomes in cell culture medium (CCM) were isolated by the ExoQuick method, and the total RNA of exosomes was extracted using the RNeasy Mini Kit. RT-qPCR assay showed that circRNA\_102481 was significantly up-regulated in exosomes of EGFR-TKIs resistant cells (PC9/GR and

HCC827/ER) compared with its expression level in sensitive cells (PC9 and HCC827) (Figure 3C, 3D;  $p < 0.05$ ).

The total RNA of CCM in each cell line was also extracted using the RNeasy Mini Kit. RT-qPCR assay demonstrated that the circRNA\_102481 expression levels in exosomes were almost equal to those in CCM, but, the levels of circRNA\_102481 expression in EGFR-TKIs-resistant cells were significantly higher than in CCM and exosomes (Figure 4A;  $p < 0.05$ ), indicating that extracellular circRNA\_102481 was contained in exosomes, which means that circRNA\_102481 is mainly secreted to CCM in the form of exosomes. In order to verify whether circRNA\_102481 is secreted through packaging into exosomes, the extracellular circRNA\_102481 expression level after treatment with ribonucleic (RNase) was detected. As revealed in Figure 4B, circRNA\_102481 in CCM was hardly influenced by treatment with RNase alone, but its level significantly decreased when upon treatment RNase and Triton

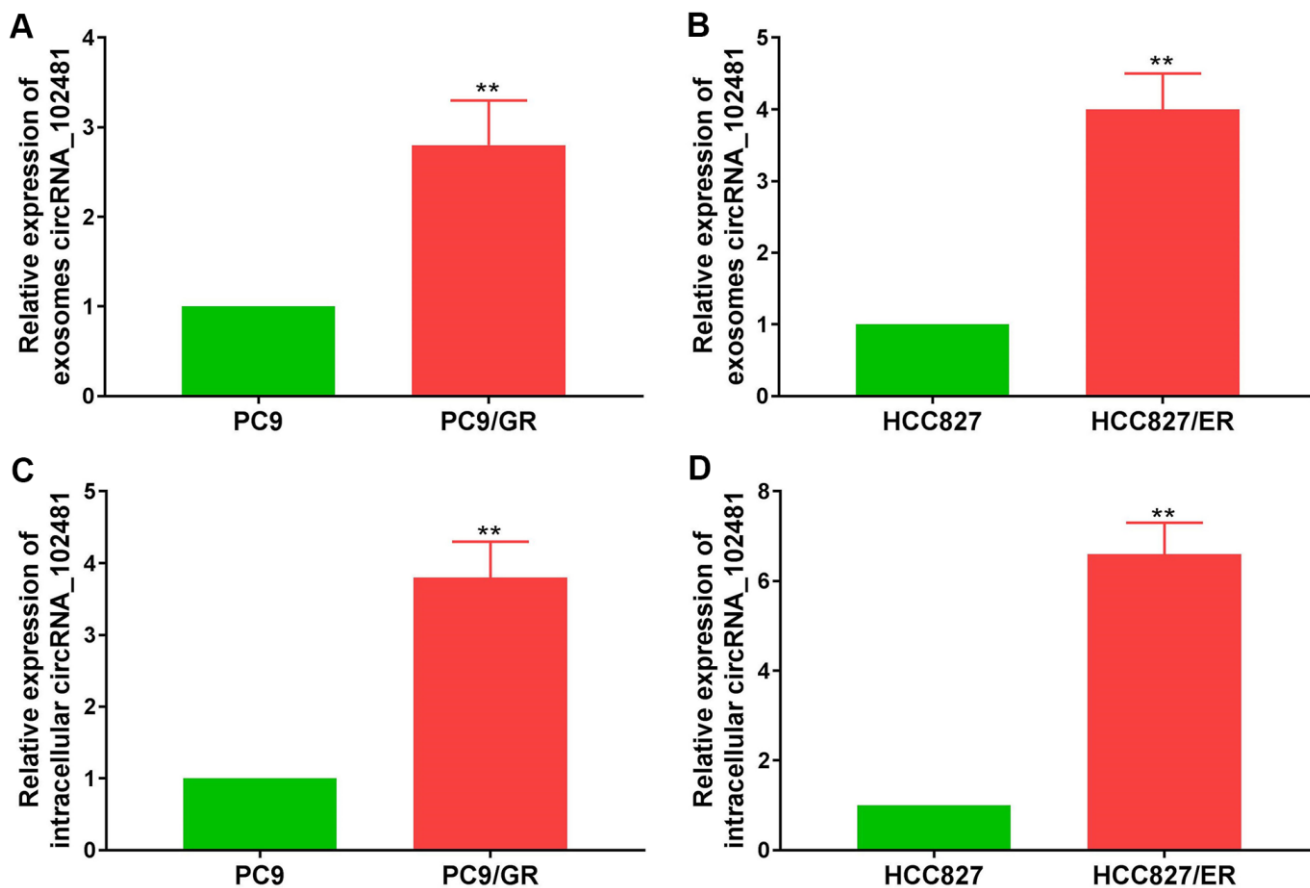

**Figure 3. circRNA\_102481 is mainly secreted via exosomes.** (A, B) circRNA\_102481 was unregulated in EGFR-TKIs resistant cells (PC9/GR and HCC827/ER),  $**p < 0.01$  versus matched sensitive cells (PC9 and HCC827). (C, D) circRNA\_102481 was significantly up-regulated in exosomes of EGFR-TKIs resistant cells (PC9/GR and HCC827/ER),  $**p < 0.01$  versus matched sensitive cells (PC9 and HCC827).

X-100 (which can dissolve lipids and destroy membrane structures) simultaneously ( $p > 0.05$ ), suggesting that extracellular circRNA\_102481 was protected by a membrane instead of being directly secreted to the extracellular medium.

In addition, si-circRNA\_102481 and the corresponding control si-NC were transfected into PC9/GR and HCC827/ER cells, and the transfection efficiency was verified by a confocal laser scanning microscope and RT-qPCR assay (Figure 4C;  $p < 0.05$ ). Furthermore, exosomes in the CCM of the si-NC and si-circRNA\_102481 groups were isolated. RT-qPCR assay showed that circRNA\_102481 was significantly down-regulated in exosomes of si-circRNA\_102481 cells compared with its level in matched si-NC cells

(Figure 4D;  $p < 0.05$ ), which indicated that exosomes circRNA\_102481 can be secreted by PC9/GR and HCC827/ER cells. These results suggested that circRNA\_102481 is mainly secreted by cancer cells via exosomes.

#### Effects of circRNA\_102481 on EGFR-TKIs-resistant NSCLC cells

In our study, si-circRNA\_102481 was successfully transfected into PC9/GR and HCC827/ER cells to silence circRNA\_102481 expression. MTT and Annexin V/PI assays were conducted to investigate the role of circRNA\_102481 on PC9/GR and HCC827/ER cells. The MTT assay results showed that, with gefitinib treatment, the cell viability of PC9/GR cells was

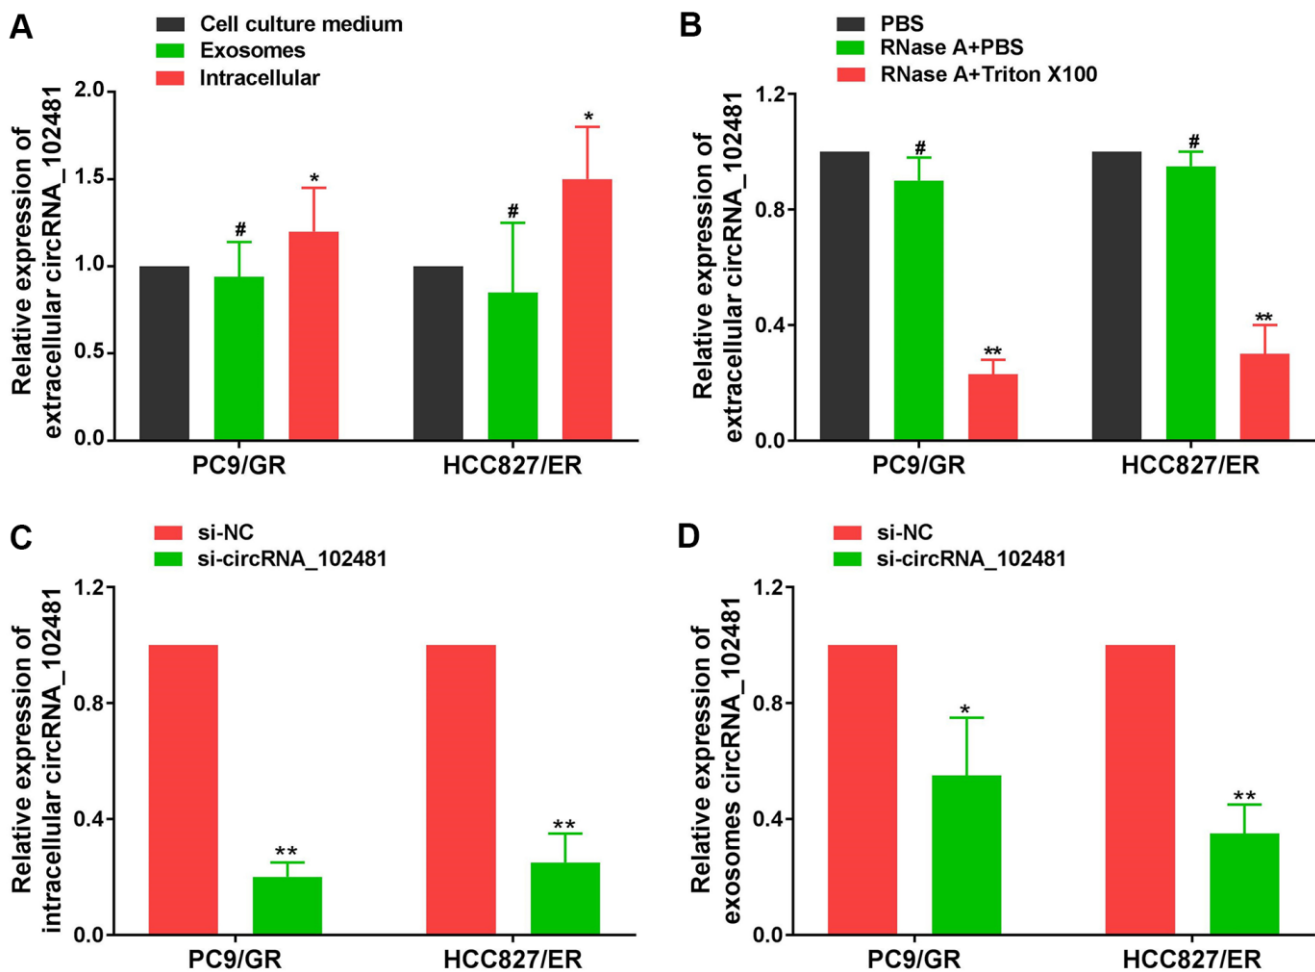

**Figure 4. Exosomal circRNA\_102481 derived from EGFR-TKIs resistance cells.** (A) circRNA\_102481 expression levels in exosomes were almost equal to those in CCM, but, the levels of circRNA\_102481 expression in EGFR-TKIs-resistant cells were significantly higher than in CCM and exosomes,  $\#p > 0.05$ ,  $*p < 0.05$ . (B) RT-qPCR was performed to detect the expression level of circRNA\_102481 after treatment with 1  $\mu$ g/ml RNase alone or combined with 0.1% Triton X-100 for 30 min,  $\#p > 0.05$ ,  $*p < 0.05$  compared to the PBS control. (C) Transfection efficiency of circRNA\_102481 was verified by a confocal laser scanning microscope and RT-qPCR assay.  $**P < 0.01$  versus si-NC group cells. (D) circRNA\_102481 was significantly down-regulated in exosomes of si-circRNA\_102481 cells.  $*p < 0.05$ ,  $**p < 0.01$  versus si-NC group exosomes. CCM: cell culture medium.

significantly inhibited following the interference of circRNA\_102481, and the half-maximal inhibitory concentration (IC50) value of gefitinib was markedly decreased in the si-circRNA\_102481 group compared with that in the si-NC group (IC50, 2.28 vs. 4.35  $\mu\text{mol/l}$ ; Figure 5A;  $p < 0.05$ ). Similarly, with erlotinib treatment, the cell viability of HCC827/ER cells was also significantly inhibited following the interference of circRNA\_102481, and the IC50 value of erlotinib was

markedly decreased in the si-circRNA\_102481 group compared with that in the si-NC group (IC50, 4.02 vs. 11.25  $\mu\text{mol/l}$ ; Figure 5B;  $p < 0.05$ ).

In addition, after treatment with 2  $\mu\text{mol/l}$  gefitinib or 4  $\mu\text{mol/l}$  erlotinib for 24 h, the results of Annexin V/PI assay demonstrated that the apoptosis rate was markedly increased in the si-circRNA\_102481 group compared with that in the corresponding si-NC group

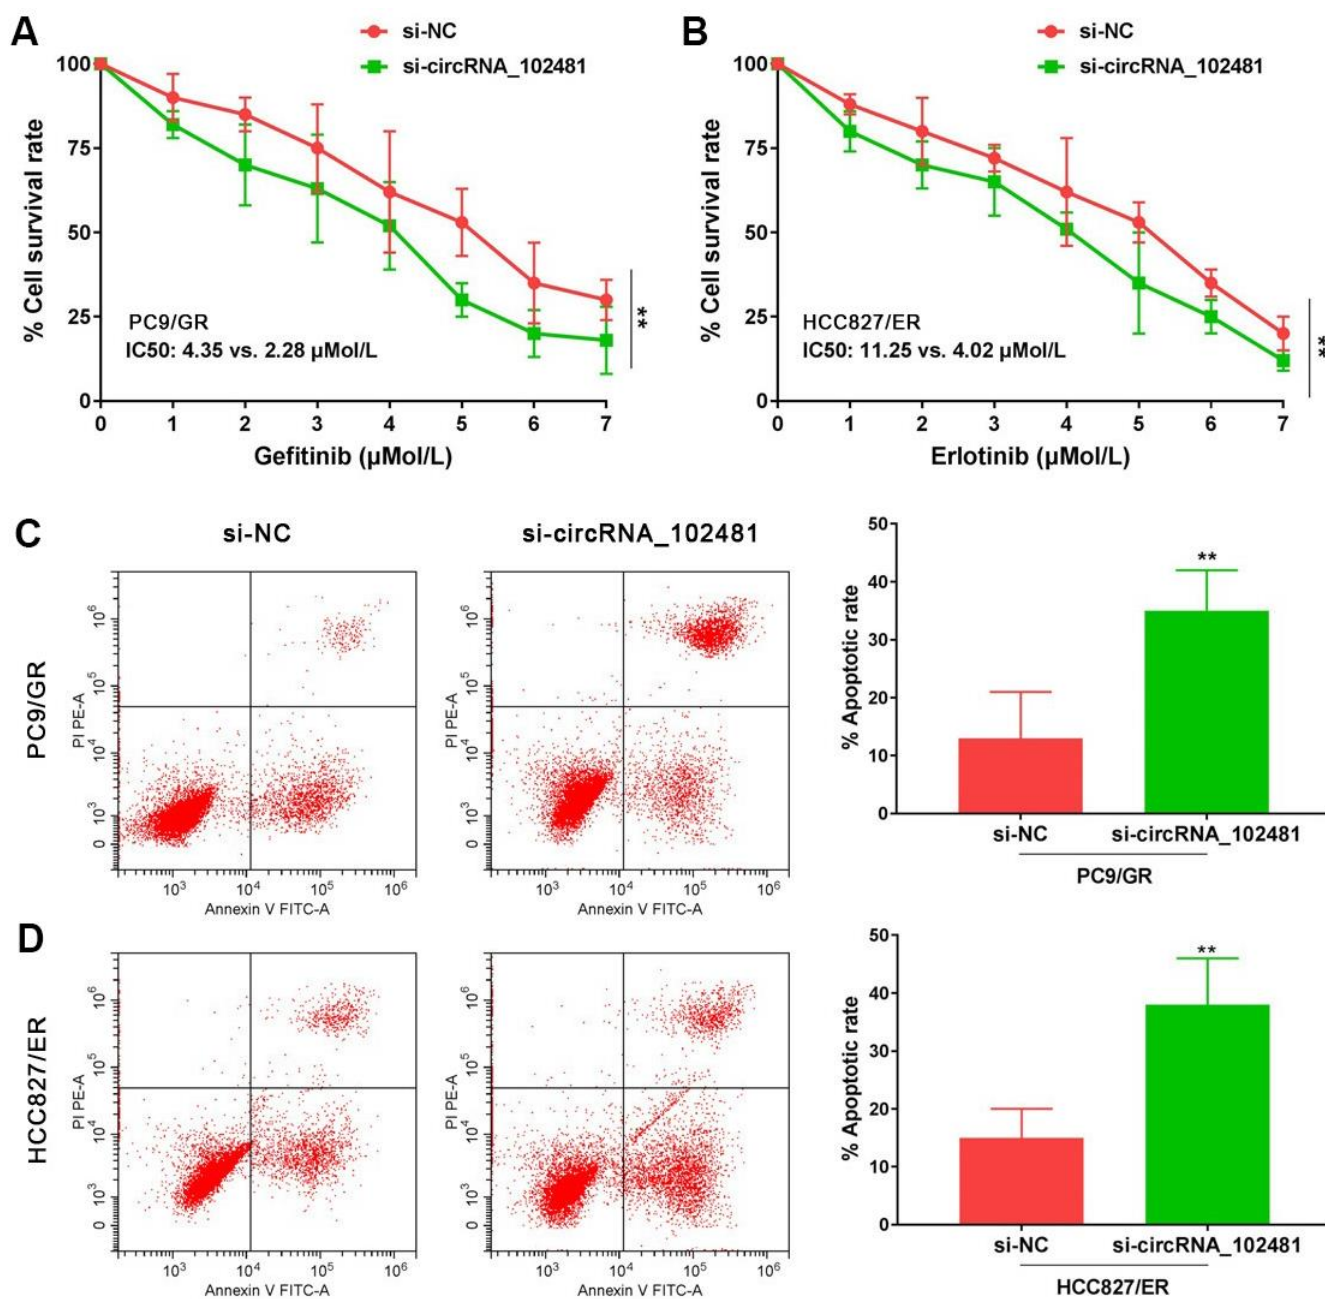

**Figure 5. Functional validation assay of circRNA\_102481 on EGFR-TKIs resistant cells *in vitro* (n=3).** (A, B) MTT assay showed the effects of circRNA\_102481 on EGFR-TKIs resistant cell proliferation. (C, D) Annexin V/PI assay showed the effects of circRNA\_102481 on EGFR-TKIs resistant cell apoptosis. si-circRNA\_102481: siRNA targeting circRNA\_102481. \*\* $p < 0.01$  versus si-NC group.



(Figure 5C, 5D;  $p < 0.05$ ). These results indicated that circRNA\_102481 silencing could inhibit EGFR-TKIs resistance NSCLC cell proliferation and promote cell apoptosis *in vitro*, thereby enhancing EGFR-TKIs sensitivity to NSCLC.

### Effects of exosomes containing circRNA\_102481 on EGFR-TKIs-resistant NSCLC cells

In order to determine the role of exosomes-derived circRNA\_102481, the exosomes of the si-NC and si-

circRNA\_102481 cells were extracted and co-cultured with PC9/GR and HCC827/ER cells in our study. The results of MTT assay showed that, with gefitinib or erlotinib treatment, the cell viability of PC9/GR and HCC827/ER cells was significantly inhibited when they were co-cultured with exosomes of the si-circRNA\_102481 group, and the IC50 value was also markedly decreased (IC50, 3.12 vs. 4.88  $\mu\text{mol/l}$  and 5.85 vs. 12.04  $\mu\text{mol/l}$ , respectively), compared with that of co-culture of exosomes in the si-NC group (Figure 6A, 6B;  $p < 0.05$ ).

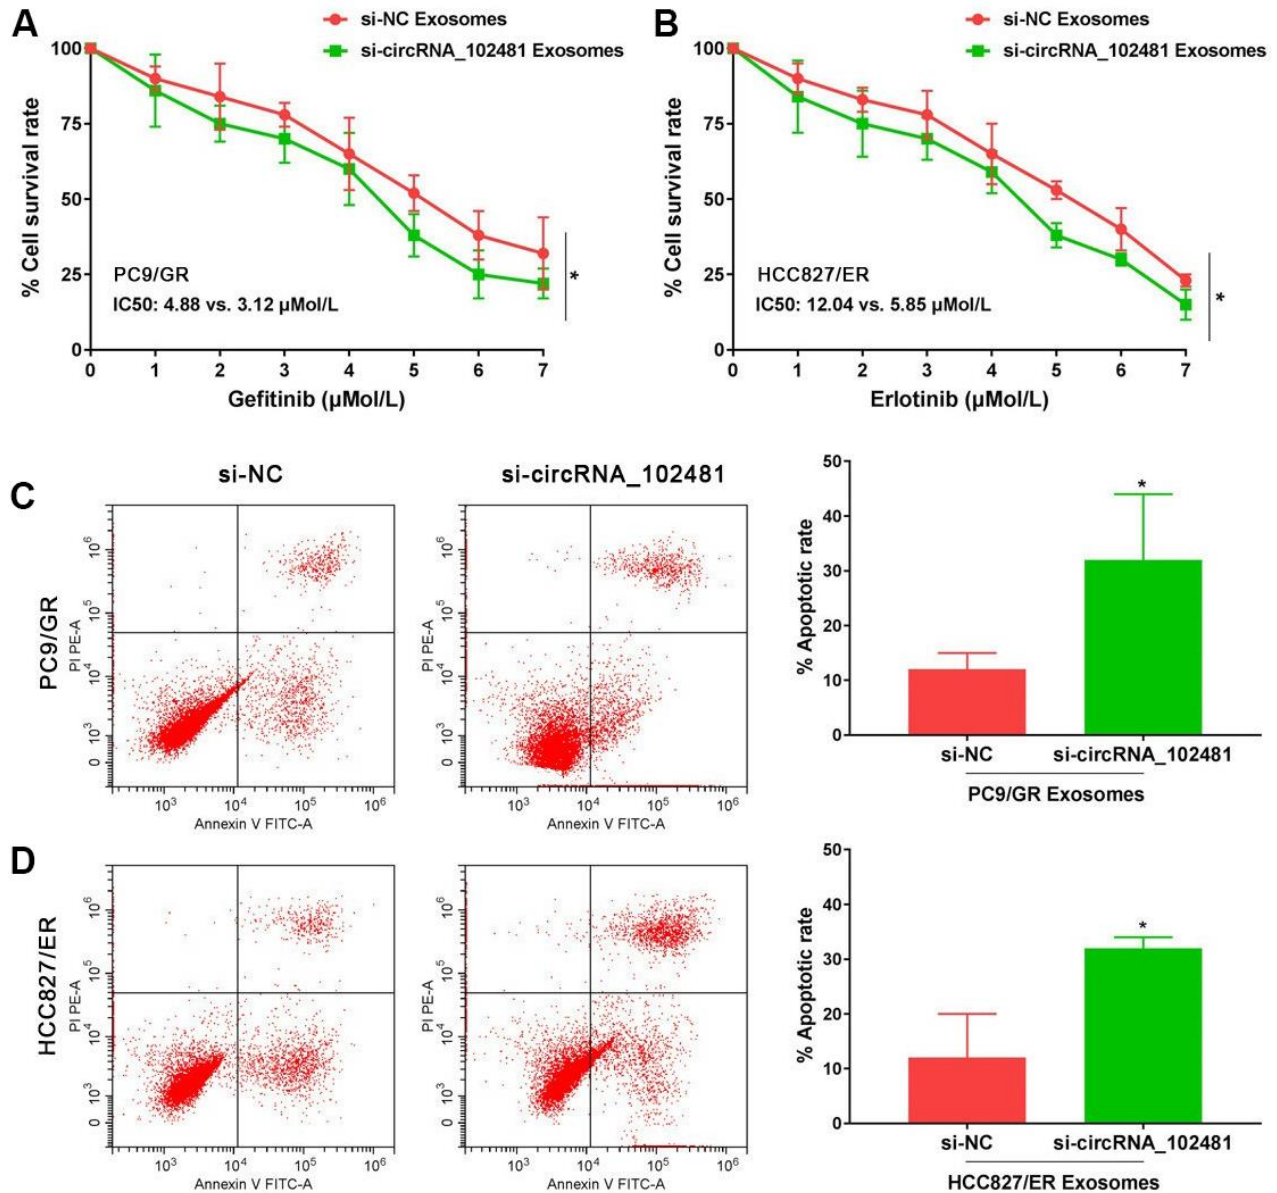

**Figure 6. Functional validation assay of exosomes circRNA\_102481 on EGFR-TKIs resistant cells *in vitro* (n=3).** (A, B) MTT assay showed the effects of exosomes circRNA\_102481 on EGFR-TKIs resistant cell proliferation. (C, D) Annexin V/PI assay showed the effects of exosomes circRNA\_102481 on EGFR-TKIs resistant cell apoptosis. si-circRNA\_102481: siRNA targeting circRNA\_102481. \* $p < 0.05$  versus si-NC group.

In addition, after treatment with 2  $\mu\text{mol/l}$  gefitinib or 4  $\mu\text{mol/l}$  erlotinib for 24 h, the results of Annexin V/PI assay demonstrated that the apoptosis rate was markedly increased when cells were co-cultured with exosomes of the si-circRNA\_102481 group compared with that of the corresponding si-NC group (Figure 6C, 6D;  $p < 0.05$ ). These results suggested that exosomal circRNA\_102481 could inhibit EGFR-TKIs resistance NSCLC cell proliferation and promote cell apoptosis. It also indirectly indicated that circRNA\_102481 mainly acts through exosomes.

### Effects of circRNA\_102481 on EGFR-TKIs-sensitive NSCLC cells

In our study, the full length of circRNA\_100859 vector and blank vector were transfected in PC9 and HCC827 cells. MTT assay revealed that the gefitinib (0.0, 0.025, 0.05, 0.1, 0.2, 0.4, 0.8  $\mu\text{mol/L}$ ) IC50 value in PC9 cells and the erlotinib (0.0, 0.025, 0.05, 0.1, 0.2, 0.4, 0.8  $\mu\text{mol/L}$ ) IC50 value in HCC827 cells were markedly increased in the circRNA\_100859 vector group compared with those of the blank vector group (IC50, 0.09 vs. 0.25  $\mu\text{mol/l}$  and 0.15 vs. 0.38  $\mu\text{mol/l}$ , respectively; Figure 7A, 7B;  $p < 0.05$ ). In addition, after treatment with 0.1  $\mu\text{mol/l}$  gefitinib or 0.2  $\mu\text{mol/l}$  erlotinib for 24 h, the results of the Annexin V/PI assay demonstrated that the apoptosis rate was markedly decreased in the circRNA\_100859 vector group compared with that of the blank vector group (Figure 7C, 7D;  $p < 0.05$ ). It's demonstrated that circRNA\_102481 overexpression could promote EGFR-TKIs sensitive NSCLC cell proliferation and inhibit cell apoptosis *in vitro*.

### CircRNA\_102481 serves as a miR-30a-5p sponge to regulate ROR1 expression

It is well known that a circRNA can act as a miRNA sponge to regulate targeted gene expression. In our study, miR-30a-5p was predicted as the highest targeted miRNA for circRNA\_102481, and ROR1 showed a relatively high target score in miR-30a-5p target gene prediction. Arraystar's proprietary software demonstrated that miR-30a-5p could specifically bind to circRNA\_102481 (Figure 8A), and that ROR1 could specifically bind to miR-30a-5p (Figure 8D).

miR-30a-5p was extracted after circRNA\_102481 or ROR1 pull-down assay, and RT-qPCR assay showed that miR-30a-5p of PC9/GR and HCC827/ER cells was abundantly pulled down by circRNA\_102481 or ROR1 (Figure 8B, 8E;  $p < 0.05$ ). Dual-luciferase reporter assay confirmed that miR-30a-5p competitively targeted circRNA\_102481, and that ROR1 is a direct target of miR-30a-5p (Figure 8C, 8F;  $p < 0.05$ ).

In addition, RT-qPCR assay demonstrated that miR-30a-5p expression in PC9/GR and HCC827/ER cells was significantly increased in the si-circRNA\_102481 group compared with that in the si-NC group (Figure 9A, 9B;  $p < 0.05$ ). Furthermore, miR-30a-5p NC, miR-30a-5p mimic and miR-30a-5p inhibitor were successfully transfected into PC9/GR and HCC827/ER cells (Figure 9C;  $p < 0.05$ ). RT-qPCR assay demonstrated that ROR1 mRNA expression was significantly increased in the miR-30a-5p inhibitor group and decreased in the miR-30a-5p mimic group compared with its expression in the miR-30a-5p NC group (Figure 9D, 9E;  $p < 0.05$ ).

### Effects of exosomes on the circRNA\_102481/miR-30a-5p/ROR1 axis

To further explore the interaction between exosomes and the circRNA\_102481/miR-30a-5p/ROR1 axis, a series of experiments were performed. First, RT-qPCR and western blot assays demonstrated that the ROR1 mRNA and protein levels in PC9/GR and HCC827/ER cells were significantly decreased when the cells were co-cultured with exosomes of the si-circRNA\_102481 group. By contrast, exosomes of the miR-30a-5p inhibitor group increased ROR1 mRNA and protein expression, while co-culture with exosomes of the si-circRNA\_102481 and miR-30a-5p inhibitor groups could reverse these effects (Figure 10A, 10B;  $p < 0.05$ ). MTT assay showed that the IC50 of gefitinib or erlotinib was significantly decreased in PC9/GR cells or HCC827/ER cells when co-cultured with exosomes of the si-circRNA\_102481 groups, whereas exosomes of the miR-30a-5p inhibitor group increased the IC50 of gefitinib or erlotinib. Similarly, co-culture with exosomes of the si-circRNA\_102481 and miR-30a-5p inhibitor groups could counteract these effects (IC50, 4.88 vs. 3.12 vs. 8.07 vs. 6.12  $\mu\text{mol/l}$  and 12.04 vs. 5.85 vs. 18.58 vs. 15.06  $\mu\text{mol/l}$ , respectively; Figure 10C;  $p < 0.05$ ).

### Large sample validation and correlation analysis

A total of 58 patients with NSCLC treated with EGFR-TKIs (gefitinib or erlotinib) were enrolled in our study. The serum exosomes of these 58 patients were extracted before and after developing EGFR-TKIs resistance. RT-qPCR revealed that exosomes containing circRNA\_102481 were evidently up-regulated (Figure 11A;  $p = 0.025$ ), whereas exosomes containing miR-30a-5p were significantly down-regulated (Figure 11B;  $p = 0.018$ ) in patients with EGFR-TKIs resistance ( $n = 58$ ), compared with the numbers of matched exosomes in EGFR-TKIs-sensitive patients ( $n = 58$ ). However, there were no differences in ROR1 mRNA expression in exosomes before and after developing

EGFR-TKIs resistance in patients with NSCLC (Figure 11C;  $p=0.518$ ). In addition, Pearson's correlation analysis showed that circRNA\_102481 expression in exosomes was significantly negatively correlated with miR-30a-5p expression in exosomes (Figure 11D;  $r=-0.368$ ;  $p=0.037$ ), but there was no significant linear correlation between miR-30a-5p expression in exosomes and ROR1 mRNA expression in exosomes (Figure 11E;  $r=0.068$ ;  $p=0.149$ ).

### ROR1 expression in cells and exosomes

In our large sample validation results, there were no differences in ROR1 mRNA expression in exosomes before and after developing EGFR-TKIs resistance in patients with NSCLC. To further explore the levels of ROR1 expression in EGFR-TKIs-resistant cells, ROR1 mRNA and protein detection was performed. It was found that ROR1 mRNA and protein levels were

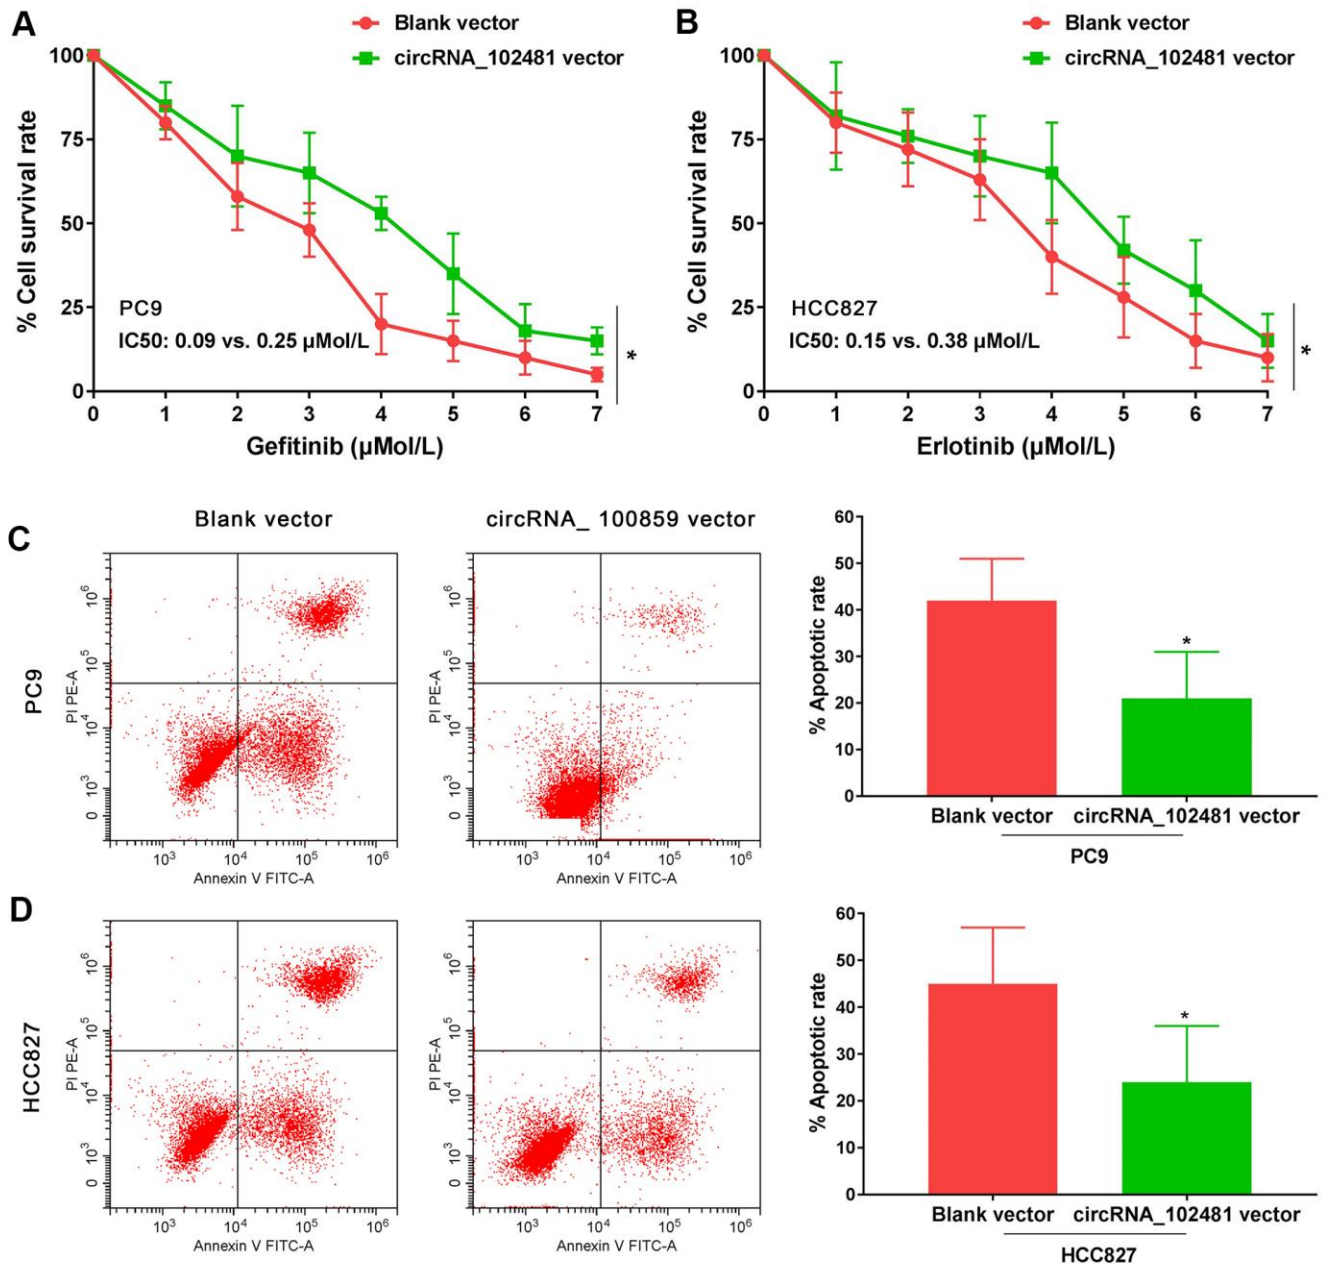

**Figure 7. Functional validation assay of exosomes circRNA\_102481 on EGFR-TKIs sensitive cells *in vitro* (n=3).** (A, B) MTT assay showed the effects of circRNA\_102481 on EGFR-TKIs sensitive cell proliferation. (C, D) Annexin V/PI assay showed the effects of circRNA\_102481 on EGFR-TKIs sensitive cell apoptosis. circRNA\_100859 vector: circRNA\_100859 overexpression vector. \* $p<0.05$  versus blank vector group.

significantly up-regulated in EGFR-TKIs resistant cells (PC9/GR and HCC827/ER) compared with its expression level in sensitive cells (PC9 and HCC827) (Figure 12A, 12B;  $p < 0.05$ ). However, in PC9/GR and HCC827/ER cells, the ROR1 mRNA and protein expression levels in exosomes were significantly lower than those in cells (Figure 12C, 12D;  $p < 0.05$ ), indicating that ROR1 mRNA and protein is not secreted in the form of exosomes by PC9/GR and HCC827/ER cells to the tumor microenvironment.

### Association between the exosomes circRNA\_1024810/miR-30a-5p/ROR1 axis and clinicopathological variables

The association between the exosomes circRNA\_1024810/miR-30a-5p/ROR1 axis and clinicopathological variables was analyzed by Fisher's exact and  $\chi^2$  tests. The OS durations in the different groups were compared using the Kaplan-Meier method and the log-rank test. At baseline, Fisher's exact and  $\chi^2$  tests demonstrated that circRNA\_102481 expression in exosomes was positively associated with TNM stage and negatively associated with tumor differentiation status (Figure 13A;  $p < 0.05$ ), whereas, miR-30a-5p expression in exosomes was negatively associated with TNM stage and positively associated with tumor differentiation status (Figure 13B;  $p < 0.05$ ). However, the status of ROR1 mRNA expression in exosomes showed no correlation with TNM stage or tumor differentiation status (Figure 13C;  $p > 0.05$ ). Notably, aberrantly high expression of circRNA\_1024810 in exosomes was closely associated with brain metastasis

(Figure 13A;  $P < 0.05$ ), while miR-30a-5p (Figure 13B;  $p > 0.05$ ) and ROR1 mRNA expression (Figure 13C;  $p > 0.05$ ) in exosomes did not correlate with brain metastasis.

The median expression of the circRNA\_1024810/miR-30a-5p/ROR1 axis was set as the cutoff value. The results of Kaplan-Meier method and log-rank test showed that patients with higher circRNA\_1024810 expression in exosomes had shorter PFS (Figure 14A;  $p = 0.035$ ) and OS (Figure 15A;  $p = 0.028$ ) times, whereas patients with higher miR-30a-5p expression in exosomes had better PFS (Figure 14B;  $p = 0.033$ ) and OS (Figure 15B;  $p = 0.043$ ) times. However, the PFS and OS duration did not differ between patients with higher and lower ROR1 mRNA expression in exosomes (Figure 14C, 15C, respectively; both  $p > 0.05$ ).

## DISCUSSION

Exosomes are an important part of the extracellular environment. Studies [22] have shown that there are about  $2 \times 10^{15}$  exosomes in the normal human circulatory system, while there are up to  $4 \times 10^{15}$  in tumor patients, and their heterogeneity can increase with tumor progression. A growing number of studies have shown that exosomes involved in the initiation and progression of a variety of tumors. Yu et al. [23] reported that exosomes-delivered nucleic acid and proteins partly facilitate the tumorigenesis, metastasis and resistance of breast cancer. Nedaenia et al. [24] demonstrated that circulating exosomes were novel biomarkers for gastrointestinal cancer. Chen et al. [25] found that

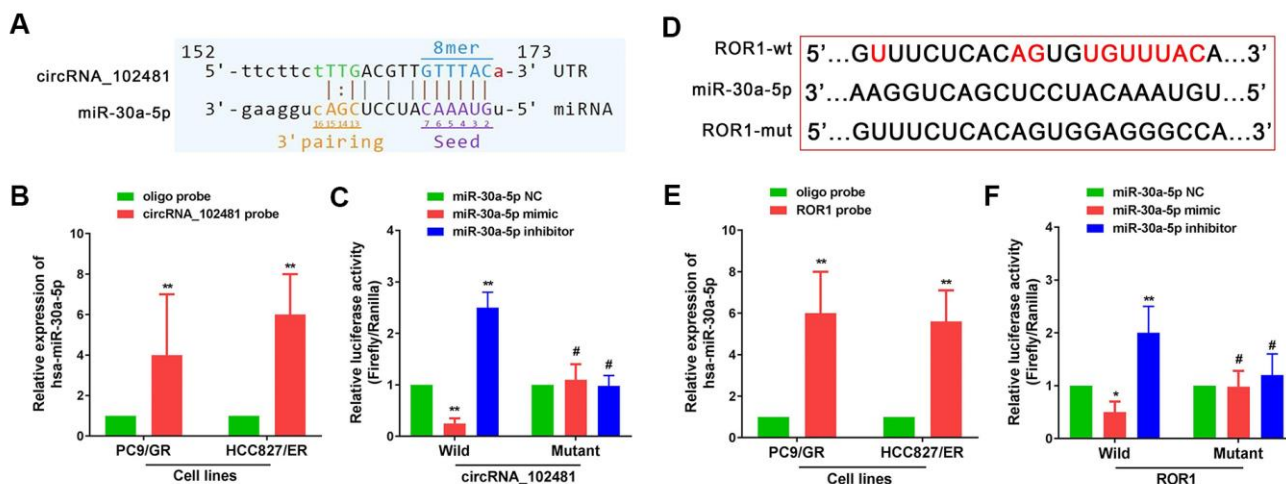

**Figure 8. circRNA\_102481 serves as a miR-30a-5p sponge to regulate ROR1 expression.** The detailed potential binding sequences of circRNA\_102481 to miR-30a-5p (A) and ROR1 to miR-30a-5p (D). miR-30a-5p of PC9/GR and HCC827/ER cells was abundantly pulled down by circRNA\_102481 (B) or ROR1 (E). Dual-luciferase reporter assay confirmed that miR-30a-5p competitively targeted circRNA\_102481(C), and that ROR1 is a direct target of miR-30a-5p (F). #  $p > 0.05$ , \*  $p < 0.05$ , \*\*  $p < 0.01$ .

Exosomes participation in lung cancer initiation, progression and metastasis as well as being involved in angiogenesis, epithelial-mesenchymal transition (EMT), immune escape, and drug resistance.

Exosomes contain biological macromolecules, and the function of exosomes is to transport this biological information to neighboring cells and play essential roles in intercellular communication and signal transduction.

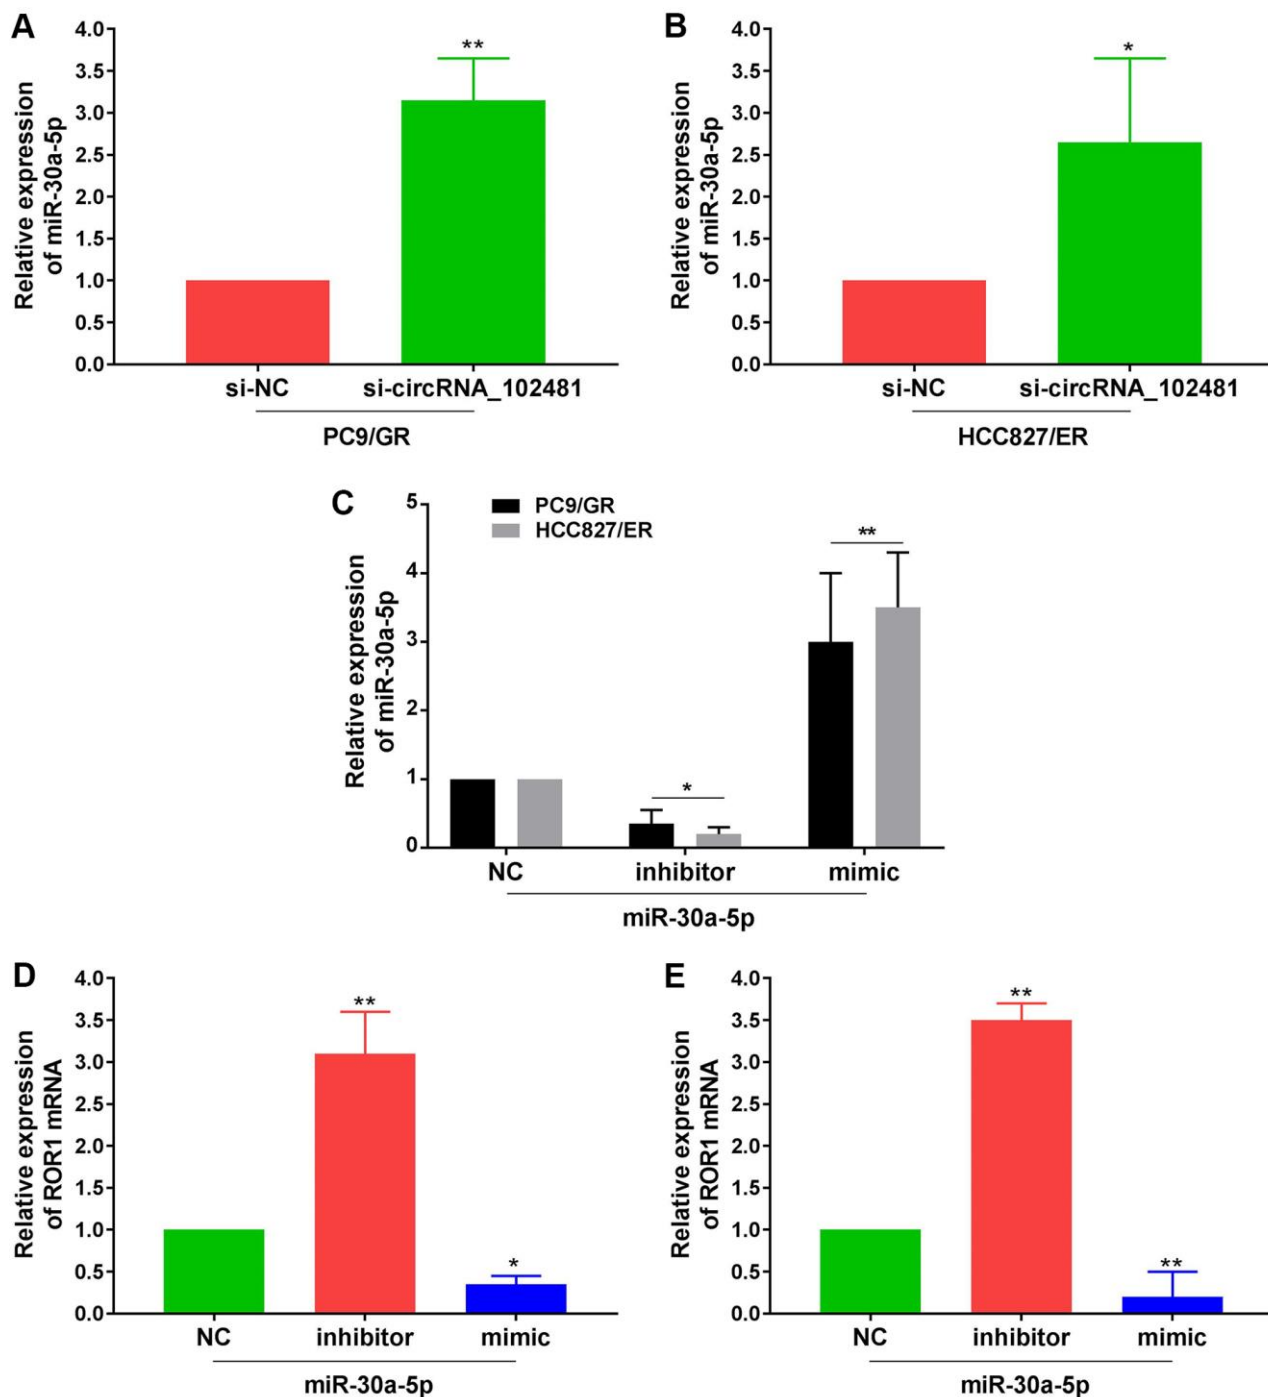

**Figure 9. Effects of exosomes on circRNA\_102481-miR-30a-5p-ROR1 Axis.** (A, B) RT-qPCR assay showed miR-30a-5p expression in PC9/GR or HCC827/ER cells of si-NC and si-circRNA\_102481 groups. (C) Transfection efficiency of miR-30a-5p mimic and miR-30a-5p inhibitor was verified by RT-qPCR assay.  $**p < 0.01$  versus miR-30a-5p NC group cells. (D, E) qRT-PCR demonstrated that ROR1 mRNA expression were significantly decreased in miR-30a-5p mimic group, and increased in miR-30a-5p inhibitor group.  $*p < 0.05$ ,  $**p < 0.01$  versus miR-30a-5p NC group.

Current studies [26–29] have shown that exosomal circRNA hold great promise as novel biomarkers for clinical diagnosis. Dai et al. [30] reported that exosomal circRNA\_100284 involved in the malignant transformation of human hepatic cells by accelerating the cell cycle and promoting cell proliferation. Zhang et al. [31] found that exosomal circRNA derived from gastric tumor promotes white adipose browning by targeting the miR-133/ PRDM16 pathway. Li et al. [32] demonstrated that exosomal circ\_IARS secreted by pancreatic cancer cells regulates endothelial monolayer

permeability to promote tumor metastasis. Shang et al. [33] showed that exosomal circ\_PACRGL promotes progression of colorectal cancer via the miR-142-3p/miR-506-3p-TGF- $\beta$ 1 axis. However, the role of tumor-derived exosomal circRNA on EGFR-TKIs resistance still remains unclear yet.

In the present study, serum exosomes were isolated from five patients with NSCLC, and differentially expressed circRNAs were identified via circRNA microarray for the first time. Our results revealed that

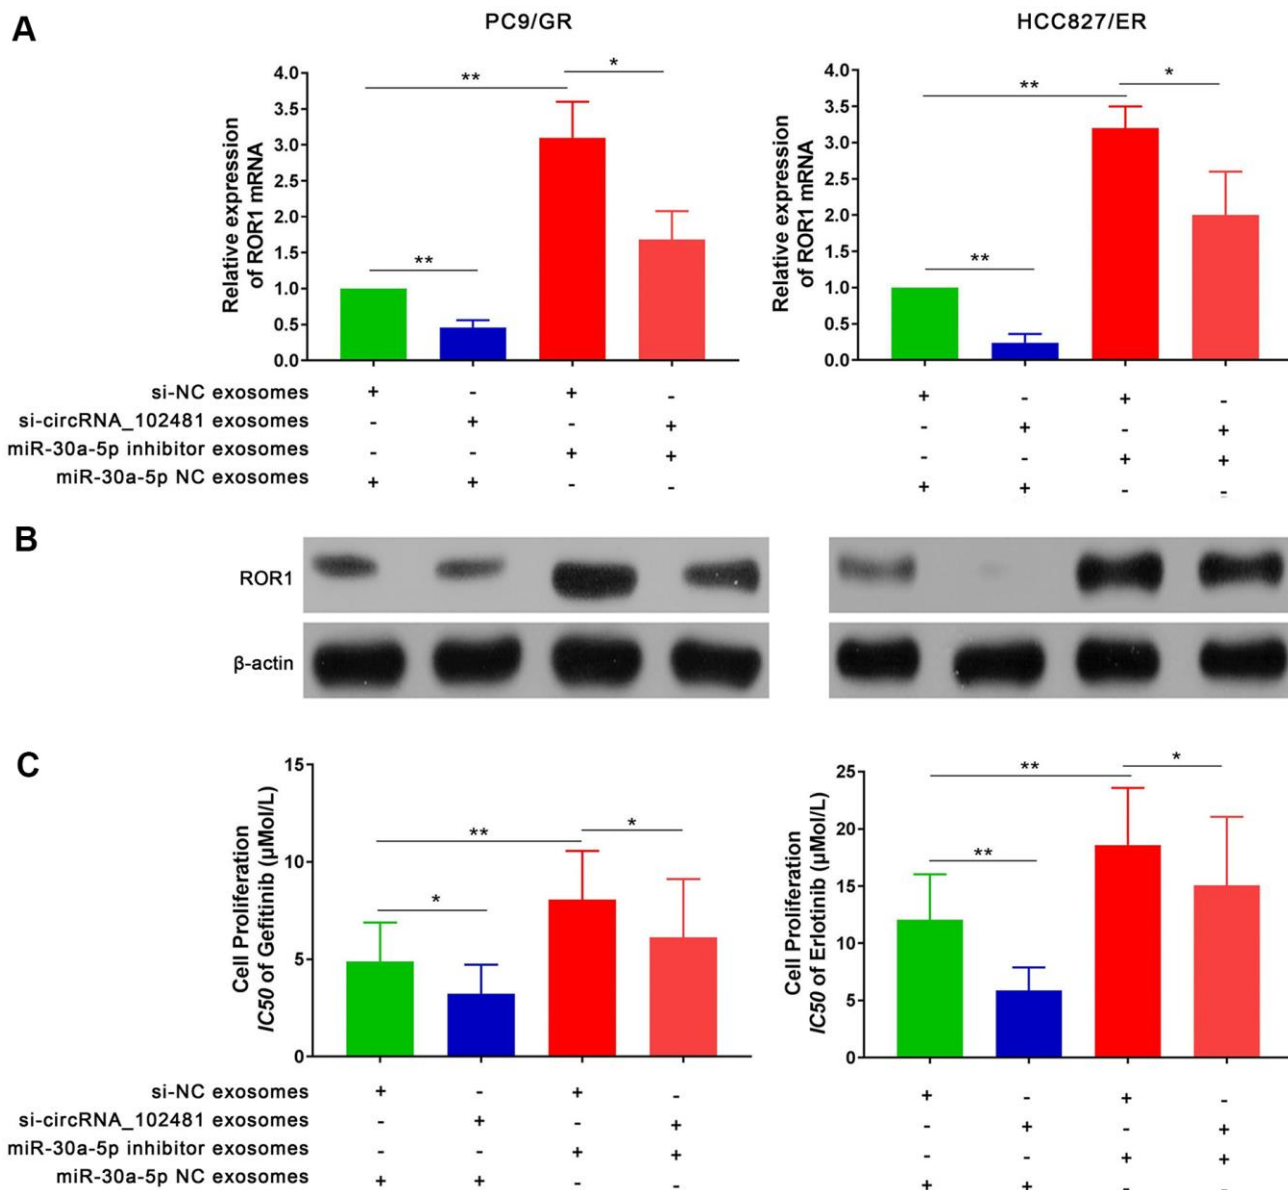

**Figure 10. Effects of exosomes on circRNA\_102481-miR-30a-5p-ROR1 Axis.** (A, B) Relative ROR1 mRNA and protein were analyzed in PC9/GR and HCC827/ER cells the cells were co-cultured with exosomes of the si-NC, si-circRNA\_102481, and miR-30a-5p NC, miR-30a-5p inhibitor using RT-qPCR and western blot assay, respectively. (C) IC50 of gefitinib or erlotinib the cells were co-cultured with exosomes of the si-NC, si-circRNA\_102481, and miR-30a-5p NC, miR-30a-5p inhibitor was detected by MTT assay. \* $p < 0.05$ , \*\* $p < 0.01$ .

circRNA\_102481 was significantly up-regulated in serum exosomes of EGFR-TKIs-resistant patients, which was further validated by RT-qPCR assay. In addition, *in vitro* functional validation assays found that circRNA\_102481 silencing inhibited EGFR-TKIs-resistant NSCLC cell proliferation and promoted apoptosis, circRNA\_102481 overexpression could promoted EGFR-TKIs sensitive NSCLC cell proliferation and inhibited cell apoptosis which suggested that circRNA\_102481 can contribute to EGFR-TKIs resistance in NSCLC.

Exosomes can derive from various types of cells. The present study investigated whether circRNA\_102481 derives from exosomes secreted by tumor cells. Our results revealed that circRNA\_102481 was up-regulated in EGFR-TKIs-resistant cells and exosomes compared with its expression in sensitive cells and exosomes. In addition, it was found that circRNA\_102481 expression levels in exosomes were almost equal to those in CCM, and that circRNA\_102481 in CCM was little influenced by treatment with RNase alone but significantly decreased following treatment with RNase and Triton X-100. Furthermore, knockdown of circRNA\_102481 in EGFR-TKIs-resistant NSCLC cells caused a significant decrease in circRNA\_102481 levels in exosomes. These results suggested that circRNA\_102481 can be secreted by EGFR-TKIs

resistant NSCLC cells, and that exosomes are the main carriers of extracellular circRNA\_102481. Further functional validation assays demonstrated that si-circRNA\_102481 transported by exosomes can inhibit cell proliferation and promote cell apoptosis, similarly to circRNA\_102481 knockdown.

Previous studies [34, 35] have demonstrated that the main function of circRNA is acting as a miRNA sponge by competitively binding to its target miRNA, thereby regulating the expression of target genes. In our study, the interaction between miR-30a-5p and circRNA\_102481 or ROR1 was predicted by starBase software and confirmed by RNA pull-down and dual-luciferase reporter assays. Rescue assay validated that ROR1 mRNA and protein levels were positively regulated by exosome-derived circRNA\_102481, but these effects could be reversed by exosome-derived miR-30a-5p. This indicated that exosome-derived circRNA\_102481 can regulate ROR1 expression by sponging miR-30a-5p. In addition, large-sample validation (n=58) found that exosome-derived circRNA\_102481 was significantly up-regulated, while exosome-derived miR-30a-5p was down-regulated in EGFR-TKIs-resistant patients. Furthermore, the expression of circRNA\_102481 and miR-30a-5p in exosomes was closely associated with TNM stage, tumor differentiation status, and PSF and OS duration.

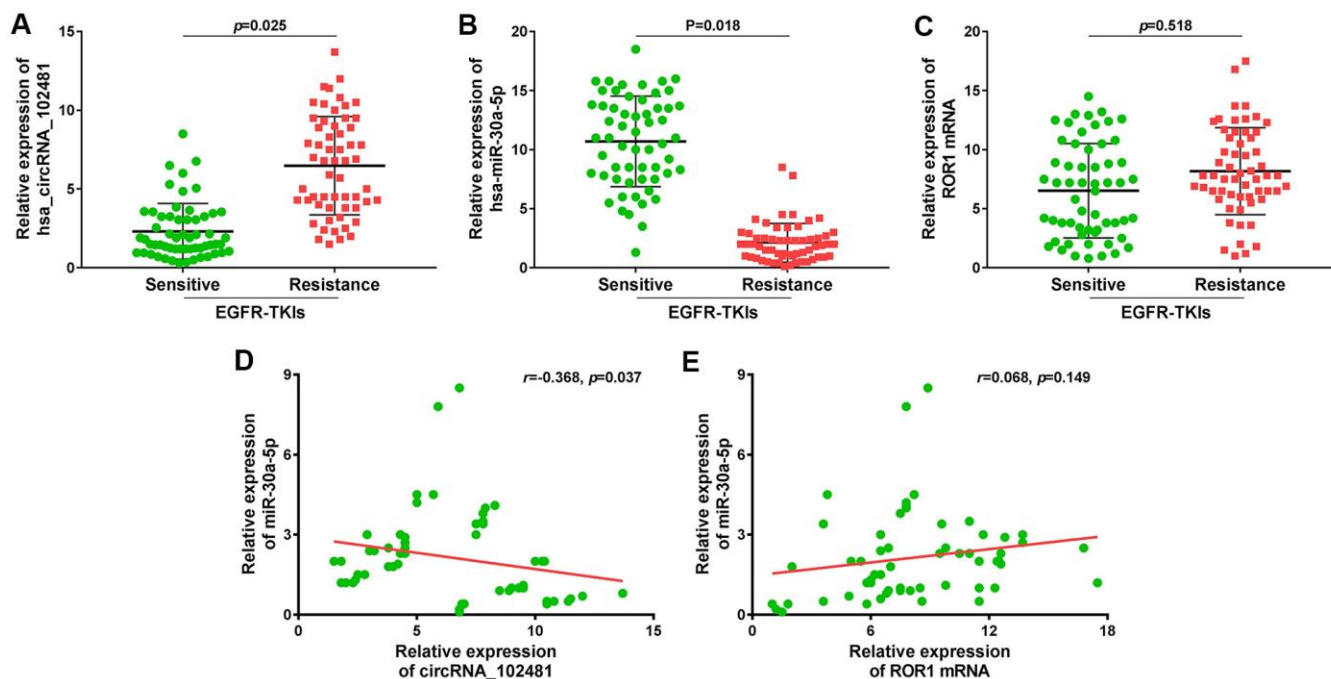

**Figure 11. Large sample validation and correlation analysis.** (A–C) RT-qPCR analysis of exosomes circRNA\_102481, exosomes miR-30a-5p, exosomes ROR1 mRNA before and after EGFR-TKIs resistance in 58 NSCLC patients. (D, E) Pearson's correlation analysis of between exosomes circRNA\_102481 and exosomes miR-30a-5p, between exosomes miR-30a-5p and exosomes ROR1 mRNA.

CircRNA\_102481 is an exonic circRNA (NM\_014173) located in chromosome 19:17278895 (GRCh38.p12), and its host gene is BABAM1. To the best of our knowledge, this is the first report about circRNA\_102481 on cancer regulation. MiR-30a-5p, a member of the miR-30 family with 22 bp in length, is highly conserved in humans [36]. MiR-30a-5p mainly plays a tumor suppressor role in various cancer types due to its alleviation of cell malignant phenotypes [37, 38]. Li et al. [39] found that miR-30a-5p inhibits breast cancer cell proliferation, migration and invasion by regulating the ERK/ETS-1 signaling pathway. Zhou et

al. [40] reported that down-regulation of miR-30a-5p is associated with poor prognosis and promotes chemoresistance to gemcitabine in pancreatic ductal adenocarcinoma. Świtlik et al. [41] reported that miR-30a-5p may serve as a promising biomarker for NSCLC. Zhang et al. [42] showed that miR-30a-5p promotes cholangiocarcinoma cell proliferation through targeting SOCS3. In our study, miR-30a-5p was demonstrated to be involved in EGFR-TKIs resistance. Notably, no differences in ROR1 mRNA expression were observed in exosomes before and after developing EGFR-TKIs resistance in large-sample validation. Our

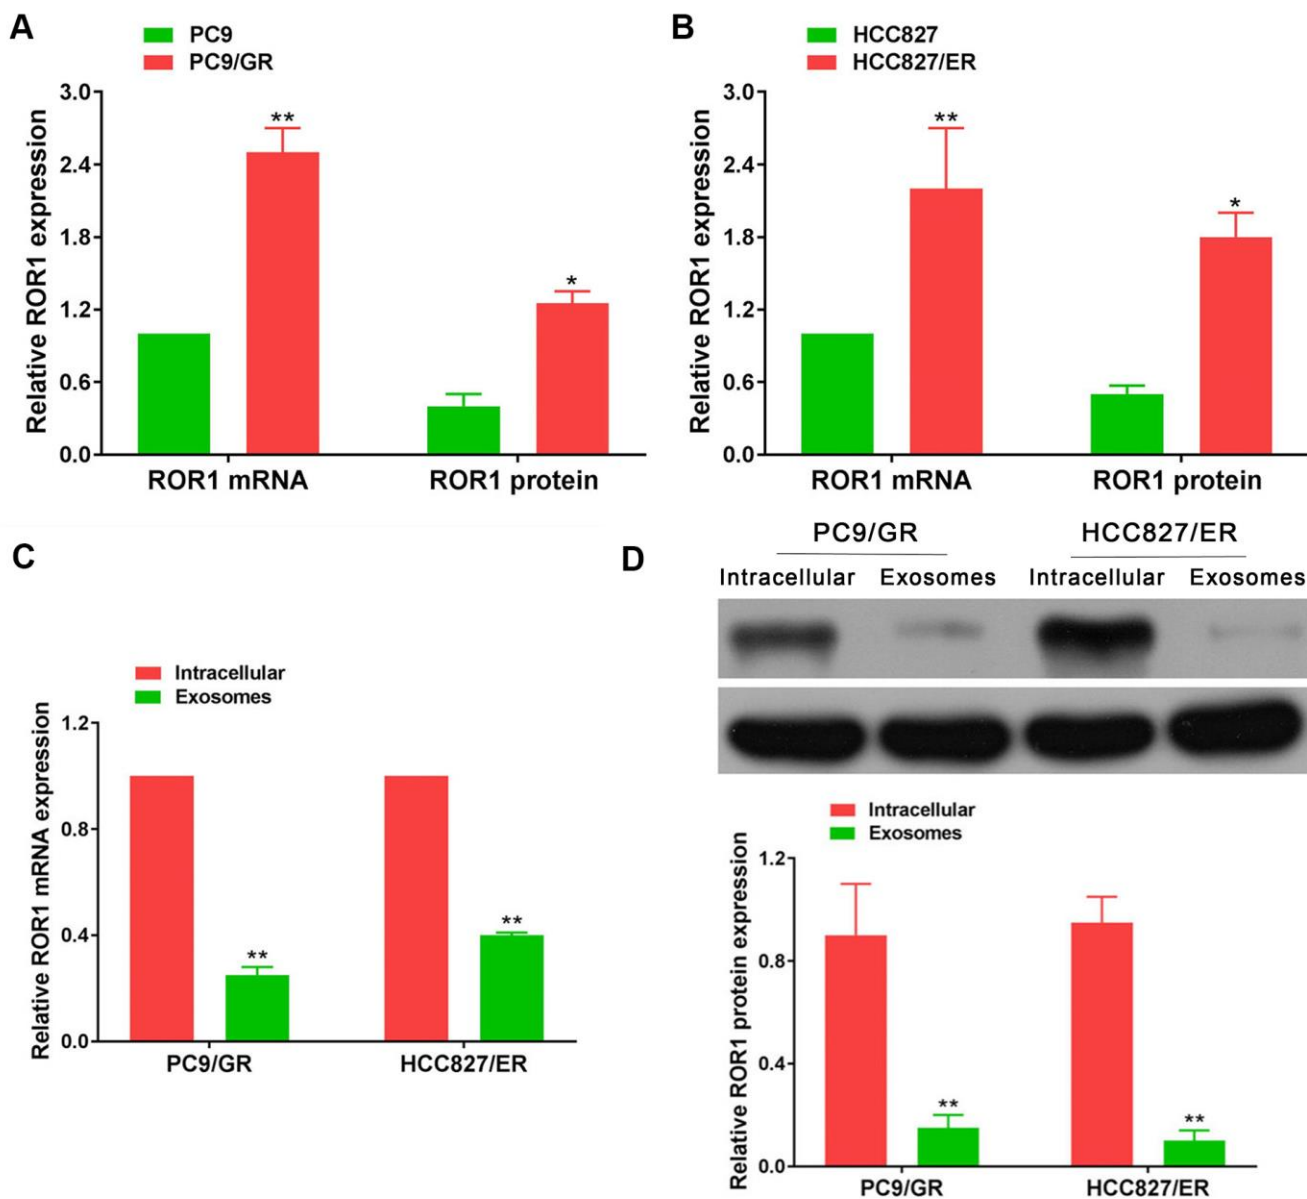

**Figure 12. ROR1 expression in cells and exosomes.** (A, B) ROR1 mRNA and protein levels were significantly up-regulated in EGFR-TKIs resistant cells (PC9/GR and HCC827/ER), \* $p < 0.05$ , \*\* $p < 0.01$  versus matched sensitive cells (PC9 and HCC827). (C, D) ROR1 mRNA and protein expression levels in exosomes were significantly lower than those in cells. \* $p < 0.05$ , \*\* $p < 0.01$  versus cells.



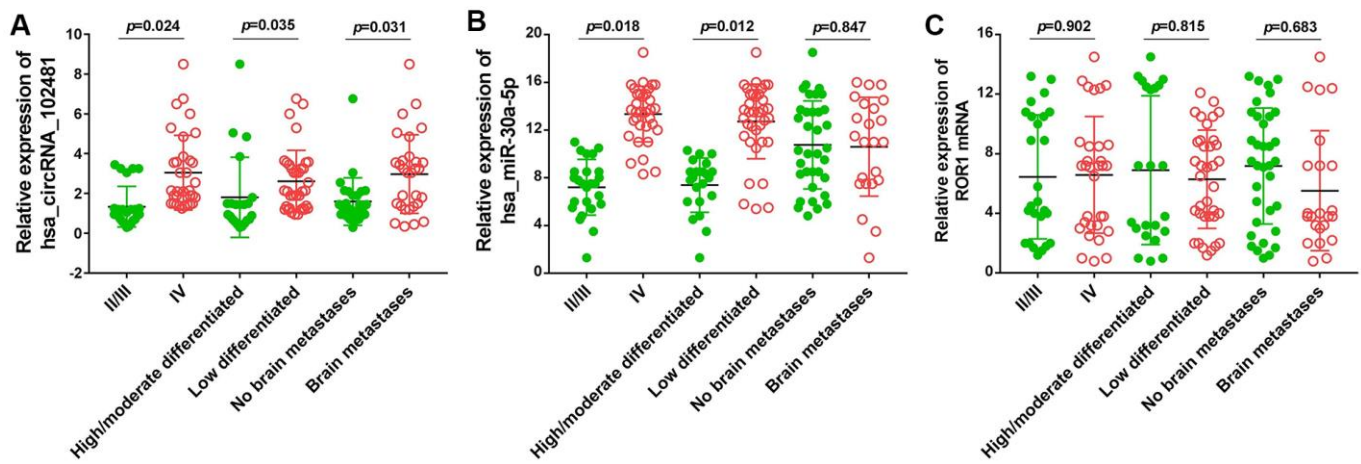

Figure 13. Relationship between exosomes circRNA\_102481-miR-30a-5p-ROR1 axis with clinicopathological variables. (A) exosomes circRNA\_102481, (B) exosomes miR-30a-5p, (C) exosomes ROR1 mRNA.

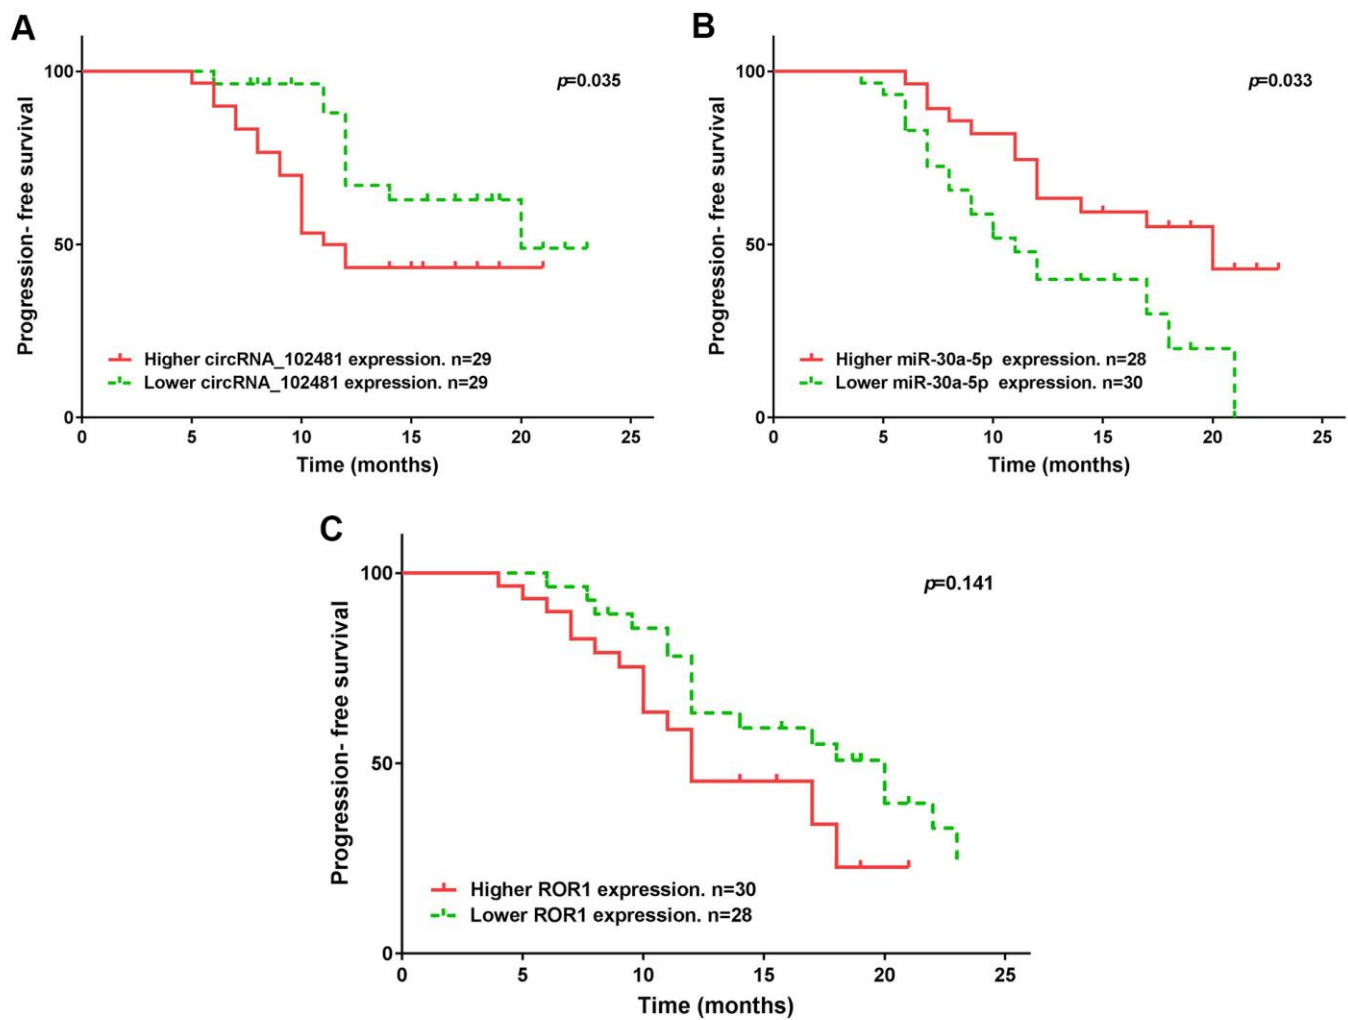

Figure 14. Kaplan-Meier PFS curve stratified by exosomes circRNA\_102481- miR-30a-5p-ROR1 axis expression. PFS duration between higher and lower (A) exosomes circRNA\_102481, (B) exosomes miR-30a-5p, (C) exosomes ROR1 mRNA.

cell experiments also showed the ROR1 mRNA and protein expression was significantly up-regulated in EGFR-TKIs-resistant cells, but its expression level in exosomes was significantly lower than that in cells, which indicated that ROR1 mRNA and protein are not secreted in the form of exosomes by EGFR-TKIs-resistant cells to the tumor microenvironment. ROR1 mainly regulates the occurrence and development of tumors in cells. RTK-like orphan receptor 1 (ROR1) is an evolutionarily conserved, type-I membrane protein that is expressed during embryogenesis [43]. Overexpression of ROR1 is known to be closely associated with tumor growth, metastasis and chemotherapy resistance in several human tumor types [44–46]. Our results suggested that ROR1 may be involved in EGFR-TKIs resistance, but its exact function needs further exploration.

However, there were several limitations in our study. Firstly and most critically, exosomes can derive from

various cell types. In our study, PC9/GR and HCC827/ER cells were employed, and it was demonstrated that resistant cells can secrete exosomes containing circRNA\_102481 to promote EGFR-TKIs resistance, but could not demonstrate whether exosome-derived circRNA\_102481 can be secreted by other cells in the body simultaneously. Secondly, our study only focused on cell function *in vitro*, whereas it lacked animal experiments for further *in vivo* verification. Thirdly, only 58 patients were enrolled in our study; thus, the sample size was relatively small, and the longest follow-up time was 25 months, which may ultimately affect the judgment of OS.

## CONCLUSIONS

In conclusion, our study revealed for the first time that exosomal circRNA\_102481 was significantly up-regulated in NSCLC with EGFR-TKIs resistance. Tumor-derived exosomal circRNA\_102481 could

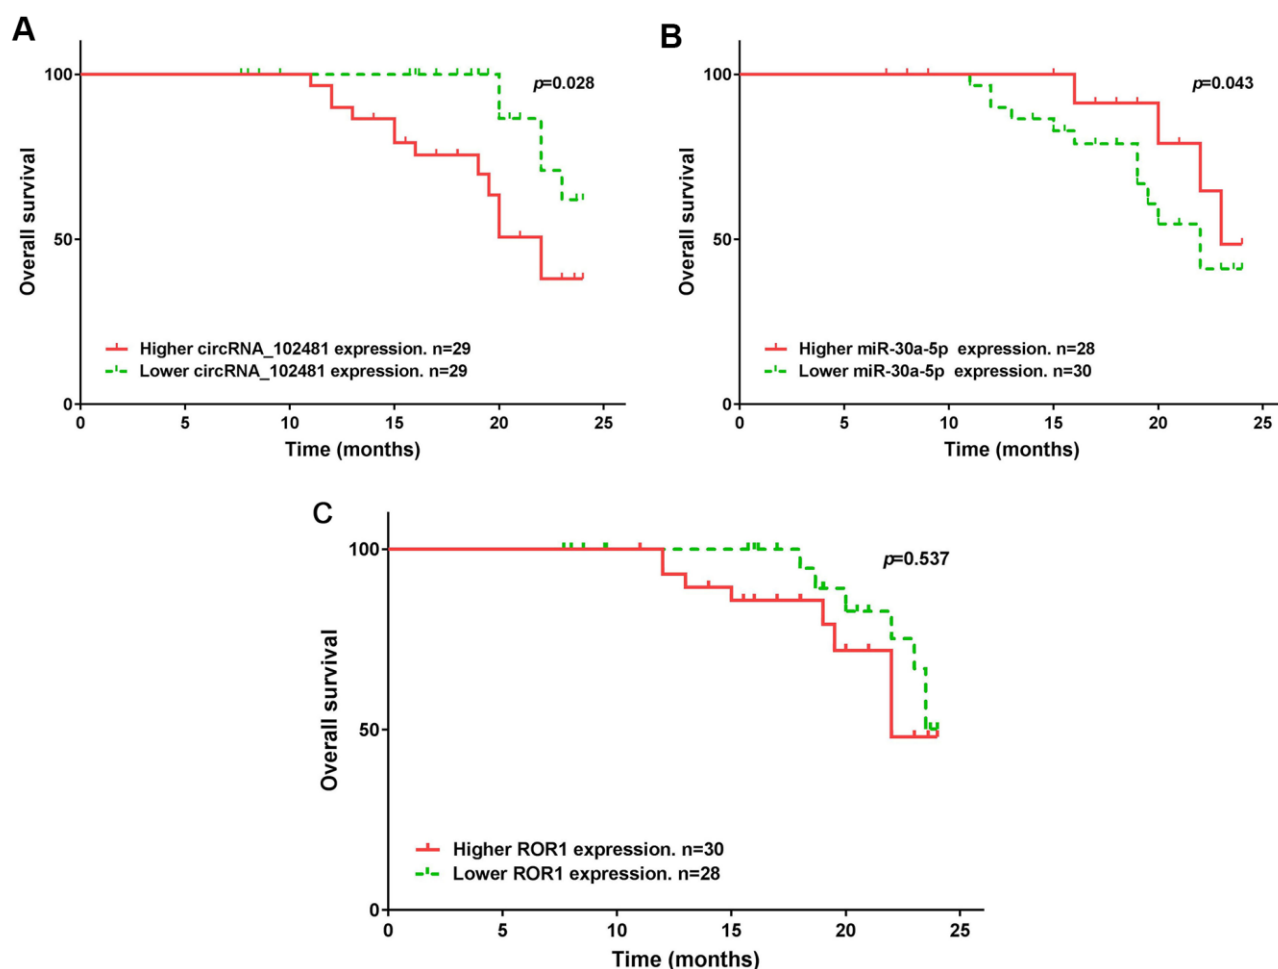

**Figure 15. Kaplan-Meier OS curve stratified by exosomes circRNA\_102481- miR-30a-5p-ROR1 axis expression.** OS duration between higher and lower (A) exosomes circRNA\_102481, (B) exosomes miR-30a-5p, (C) exosomes ROR1 mRNA.

contribute to EGFR-TKIs resistance in NSCLC by sponging miR-30a-5p to enhance ROR1 expression. Exosomal circRNA\_102481 may serve as a novel diagnostic biomarker and a therapeutic target for EGFR-TKIs resistance in NSCLC.

### Data availability

The datasets used/or analyzed during the current study are available from the corresponding author on reasonable request.

### AUTHOR CONTRIBUTIONS

Guang-hu Li and Yong-Sheng Cui designed the study, analyzed the original results, and revised and approved the final version of the manuscript. Bo Yang and Fei Teng conducted the experiments, interpreted the original results, and drafted the manuscript. Liang Chang performed statistical analysis. Jian Wang analyzed and interpreted the patient data. De-long Liu prepared the reagents and kits. All authors have read and approved the final manuscript.

### CONFLICTS OF INTEREST

The authors declare that they have no conflicts of interest.

### FUNDING

The project was received support from Natural Science Foundation Project (No.JDYY11202037).

### REFERENCES

1. Kujtan L, Subramanian J. Epidermal growth factor receptor tyrosine kinase inhibitors for the treatment of non-small cell lung cancer. *Expert Rev Anticancer Ther.* 2019; 19:547–59. <https://doi.org/10.1080/14737140.2019.1596030> PMID:30913927
2. Gelatti AC, Drilon A, Santini FC. Optimizing the sequencing of tyrosine kinase inhibitors (TKIs) in epidermal growth factor receptor (EGFR) mutation-positive non-small cell lung cancer (NSCLC). *Lung Cancer.* 2019; 137:113–22. <https://doi.org/10.1016/j.lungcan.2019.09.017> PMID:31568888
3. Chang LC, Lim CK, Chang LY, Chen KY, Shih JY, Yu CJ. Non-small cell lung cancer harbouring non-resistant uncommon EGFR mutations: mutation patterns, effectiveness of epidermal growth factor receptor-tyrosine kinase inhibitors and prognostic factors. *Eur J Cancer.* 2019; 119:77–86.

- <https://doi.org/10.1016/j.ejca.2019.06.025> PMID:31425965
4. Jia Y, Yun CH, Park E, Ercan D, Manuia M, Juarez J, Xu C, Rhee K, Chen T, Zhang H, Palakurthi S, Jang J, Lelais G, et al. Overcoming EGFR(T790M) and EGFR(C797S) resistance with mutant-selective allosteric inhibitors. *Nature.* 2016; 534:129–32. <https://doi.org/10.1038/nature17960> PMID:27251290
5. Jin C, Yuan P. Implications of lipid droplets in lung cancer: associations with drug resistance. *Oncol Lett.* 2020; 20:2091–104. <https://doi.org/10.3892/ol.2020.11769> PMID:32782526
6. Pegtel DM, Gould SJ. Exosomes. *Annu Rev Biochem.* 2019; 88:487–514. <https://doi.org/10.1146/annurev-biochem-013118-111902> PMID:31220978
7. Meldolesi J. Exosomes and ectosomes in intercellular communication. *Curr Biol.* 2018; 28:R435–44. <https://doi.org/10.1016/j.cub.2018.01.059> PMID:29689228
8. Knox MC, Ni J, Bece A, Bucci J, Chin Y, Graham PH, Li Y. A clinician's guide to cancer-derived exosomes: immune interactions and therapeutic implications. *Front Immunol.* 2020; 11:1612. <https://doi.org/10.3389/fimmu.2020.01612> PMID:32793238
9. Gilligan KE, Dwyer RM. Engineering exosomes for cancer therapy. *Int J Mol Sci.* 2017; 18:1122. <https://doi.org/10.3390/ijms18061122> PMID:28538671
10. Steinbichler TB, Dudás J, Riechelmann H, Skvortsova II. The role of exosomes in cancer metastasis. *Semin Cancer Biol.* 2017; 44:170–81. <https://doi.org/10.1016/j.semcancer.2017.02.006> PMID:28215970
11. Ruivo CF, Adem B, Silva M, Melo SA. The biology of cancer exosomes: insights and new perspectives. *Cancer Res.* 2017; 77:6480–88. <https://doi.org/10.1158/0008-5472.CAN-17-0994> PMID:29162616
12. Chen BY, Sung CW, Chen C, Cheng CM, Lin DP, Huang CT, Hsu MY. Advances in exosomes technology. *Clin Chim Acta.* 2019; 493:14–19. <https://doi.org/10.1016/j.cca.2019.02.021> PMID:30797770
13. Ding J, Wang Q, Guo N, Wang H, Chen H, Ni G, Li P. CircRNA circ\_0072995 promotes the progression of epithelial ovarian cancer by modulating miR-147a/CDK6 axis. *Aging (Albany NY).* 2020; 12:17209–23.

- <https://doi.org/10.18632/aging.103668>  
PMID:[32877369](https://pubmed.ncbi.nlm.nih.gov/32877369/)
14. Du WW, Zhang C, Yang W, Yong T, Awan FM, Yang BB. Identifying and characterizing circRNA-protein interaction. *Theranostics*. 2017; 7:4183–91.  
<https://doi.org/10.7150/thno.21299>  
PMID:[29158818](https://pubmed.ncbi.nlm.nih.gov/29158818/)
15. Wawrzyniak O, Zarębska Ż, Kuczyński K, Gotz-Więckowska A, Rolle K. Protein-related circular RNAs in human pathologies. *Cells*. 2020; 9:1841.  
<https://doi.org/10.3390/cells9081841> PMID:[32781555](https://pubmed.ncbi.nlm.nih.gov/32781555/)
16. Veá A, Llorente-Cortés V, de Gonzalo-Calvo D. Circular RNAs in blood. *Adv Exp Med Biol*. 2018; 1087:119–30.  
[https://doi.org/10.1007/978-981-13-1426-1\\_10](https://doi.org/10.1007/978-981-13-1426-1_10)  
PMID:[30259362](https://pubmed.ncbi.nlm.nih.gov/30259362/)
17. Liu J, Li D, Luo H, Zhu X. Circular RNAs: The star molecules in cancer. *Mol Aspects Med*. 2019; 70:141–52.  
<https://doi.org/10.1016/j.mam.2019.10.006>  
PMID:[31676107](https://pubmed.ncbi.nlm.nih.gov/31676107/)
18. Zhang HD, Jiang LH, Sun DW, Hou JC, Ji ZL. CircRNA: A novel type of biomarker for cancer. *Breast Cancer*. 2018; 25:1–7.  
<https://doi.org/10.1007/s12282-017-0793-9>  
PMID:[28721656](https://pubmed.ncbi.nlm.nih.gov/28721656/)
19. Zhang X, Lu N, Wang L, Wang Y, Li M, Zhou Y, Yan H, Cui M, Zhang M, Zhang L. Circular RNAs and esophageal cancer. *Cancer Cell Int*. 2020; 20:362.  
<https://doi.org/10.1186/s12935-020-01451-0>  
PMID:[32774156](https://pubmed.ncbi.nlm.nih.gov/32774156/)
20. Ma S, Kong S, Wang F, Ju S. CircRNAs: biogenesis, functions, and role in drug-resistant tumours. *Mol Cancer*. 2020; 19:119.  
<https://doi.org/10.1186/s12943-020-01231-4>  
PMID:[32758239](https://pubmed.ncbi.nlm.nih.gov/32758239/)
21. Soe ZY, Park EJ, Shimaoka M. Integrin Regulation in Immunological and Cancerous Cells and Exosomes. *Int J Mol Sci*. 2021; 22:2193.  
<https://doi.org/10.3390/ijms22042193>  
PMID:[33672100](https://pubmed.ncbi.nlm.nih.gov/33672100/)
22. Jafari A, Babajani A, Abdollahpour-Alitappeh M, Ahmadi N, Rezaei-Tavirani M. Exosomes and cancer: from molecular mechanisms to clinical applications. *Med Oncol*. 2021; 38:45.  
<https://doi.org/10.1007/s12032-021-01491-0>  
PMID:[33743101](https://pubmed.ncbi.nlm.nih.gov/33743101/)
23. Yu DD, Wu Y, Shen HY, Lv MM, Chen WX, Zhang XH, Zhong SL, Tang JH, Zhao JH. Exosomes in development, metastasis and drug resistance of breast cancer. *Cancer Sci*. 2015; 106:959–64.  
<https://doi.org/10.1111/cas.12715>  
PMID:[26052865](https://pubmed.ncbi.nlm.nih.gov/26052865/)
24. Nedaenia R, Manian M, Jazayeri MH, Ranjbar M, Salehi R, Sharifi M, Mohaghegh F, Goli M, Jahednia SH, Avan A, Ghayour-Mobarhan M. Circulating exosomes and exosomal microRNAs as biomarkers in gastrointestinal cancer. *Cancer Gene Ther*. 2017; 24:48–56.  
<https://doi.org/10.1038/cgt.2016.77> PMID:[27982021](https://pubmed.ncbi.nlm.nih.gov/27982021/)
25. Chen R, Xu X, Qian Z, Zhang C, Niu Y, Wang Z, Sun J, Zhang X, Yu Y. The biological functions and clinical applications of exosomes in lung cancer. *Cell Mol Life Sci*. 2019; 76:4613–33.  
<https://doi.org/10.1007/s00018-019-03233-y>  
PMID:[31352532](https://pubmed.ncbi.nlm.nih.gov/31352532/)
26. Han S, Kuang M, Sun C, Wang H, Wang D, Liu Q. Circular RNA hsa\_circ\_0076690 acts as a prognostic biomarker in osteoporosis and regulates osteogenic differentiation of hBMSCs via sponging miR-152. *Aging (Albany NY)*. 2020; 12:15011–20.  
<https://doi.org/10.18632/aging.103560>  
PMID:[32717724](https://pubmed.ncbi.nlm.nih.gov/32717724/)
27. Fanale D, Taverna S, Russo A, Bazan V. Circular RNA in exosomes. *Adv Exp Med Biol*. 2018; 1087:109–17.  
[https://doi.org/10.1007/978-981-13-1426-1\\_9](https://doi.org/10.1007/978-981-13-1426-1_9)  
PMID:[30259361](https://pubmed.ncbi.nlm.nih.gov/30259361/)
28. Dai J, Su Y, Zhong S, Cong L, Liu B, Yang J, Tao Y, He Z, Chen C, Jiang Y. Exosomes: key players in cancer and potential therapeutic strategy. *Signal Transduct Target Ther*. 2020; 5:145.  
<https://doi.org/10.1038/s41392-020-00261-0>  
PMID:[32759948](https://pubmed.ncbi.nlm.nih.gov/32759948/)
29. Pei X, Chen SW, Long X, Zhu SQ, Qiu BQ, Lin K, Lu F, Xu JJ, Zhang PF, Wu YB. circMET promotes NSCLC cell proliferation, metastasis, and immune evasion by regulating the miR-145-5p/CXCL3 axis. *Aging (Albany NY)*. 2020; 12:13038–58.  
<https://doi.org/10.18632/aging.103392>  
PMID:[32614785](https://pubmed.ncbi.nlm.nih.gov/32614785/)
30. Dai X, Chen C, Yang Q, Xue J, Chen X, Sun B, Luo F, Liu X, Xiao T, Xu H, Sun Q, Zhang A, Liu Q. Exosomal circRNA\_100284 from arsenite-transformed cells, via microRNA-217 regulation of EZH2, is involved in the Malignant transformation of human hepatic cells by accelerating the cell cycle and promoting cell proliferation. *Cell Death Dis*. 2018; 9:454.  
<https://doi.org/10.1038/s41419-018-0485-1>  
PMID:[29674685](https://pubmed.ncbi.nlm.nih.gov/29674685/)
31. Zhang H, Zhu L, Bai M, Liu Y, Zhan Y, Deng T, Yang H, Sun W, Wang X, Zhu K, Fan Q, Li J, Ying G, Ba Y. Exosomal circRNA derived from gastric tumor promotes white adipose browning by targeting the miR-133/PRDM16 pathway. *Int J Cancer*. 2019;

- 144:2501–15.  
<https://doi.org/10.1002/jic.31977>  
PMID:30412280
32. Li J, Li Z, Jiang P, Peng M, Zhang X, Chen K, Liu H, Bi H, Liu X, Li X. Circular RNA IARS (circ-IARS) secreted by pancreatic cancer cells and located within exosomes regulates endothelial monolayer permeability to promote tumor metastasis. *J Exp Clin Cancer Res.* 2018; 37:177.  
<https://doi.org/10.1186/s13046-018-0822-3>  
PMID:30064461
33. Shang A, Gu C, Wang W, Wang X, Sun J, Zeng B, Chen C, Chang W, Ping Y, Ji P, Wu J, Quan W, Yao Y, et al. Exosomal circPACRGL promotes progression of colorectal cancer via the miR-142-3p/miR-506-3p- TGF- $\beta$ 1 axis. *Mol Cancer.* 2020; 19:117.  
<https://doi.org/10.1186/s12943-020-01235-0>  
PMID:32713345
34. Meng S, Zhou H, Feng Z, Xu Z, Tang Y, Li P, Wu M. CircRNA: functions and properties of a novel potential biomarker for cancer. *Mol Cancer.* 2017; 16:94.  
<https://doi.org/10.1186/s12943-017-0663-2>  
PMID:28535767
35. Kristensen LS, Andersen MS, Stagsted LV, Ebbesen KK, Hansen TB, Kjems J. The biogenesis, biology and characterization of circular RNAs. *Nat Rev Genet.* 2019; 20:675–91.  
<https://doi.org/10.1038/s41576-019-0158-7>  
PMID:31395983
36. He R, Yang L, Lin X, Chen X, Lin X, Wei F, Liang X, Luo Y, Wu Y, Gan T, Dang Y, Chen G. Erratum: MiR-30a-5p suppresses cell growth and enhances apoptosis of hepatocellular carcinoma cells via targeting AEG-1. *Int J Clin Exp Pathol.* 2020; 13:1283–84.  
PMID:32509105
37. Cheng CC, Yang BL, Chen WC, Ho AS, Sie ZL, Lin HC, Chang CC. STAT3 mediated miR-30a-5p inhibition enhances proliferation and inhibits apoptosis in colorectal cancer cells. *Int J Mol Sci.* 2020; 21:7315.  
<https://doi.org/10.3390/ijms21197315>  
PMID:33023006
38. Lu W, Wu Y, Lu CX, Zhu T, Ren ZL, Yu Z. Bioinformatics analysis of prognostic value and prospective pathway signal of miR-30a in ovarian cancer. *J Ovarian Res.* 2020; 13:120.  
<https://doi.org/10.1186/s13048-020-00722-8>  
PMID:33004058
39. Li W, Liu C, Zhao C, Zhai L, Lv S. Downregulation of  $\beta$ 3 integrin by miR-30a-5p modulates cell adhesion and invasion by interrupting Erk/Ets-1 network in triple-negative breast cancer. *Int J Oncol.* 2016; 48:1155–64.  
<https://doi.org/10.3892/ijo.2016.3319>  
PMID:26781040
40. Zhou L, Jia S, Ding G, Zhang M, Yu W, Wu Z, Cao L. Down-regulation of miR-30a-5p is associated with poor prognosis and promotes chemoresistance of gemcitabine in pancreatic ductal adenocarcinoma. *J Cancer.* 2019; 10:5031–40.  
<https://doi.org/10.7150/jca.31191>  
PMID:31602254
41. Świtlik W, Karbownik MS, Suwalski M, Kozak J, Szemraj J. miR-30a-5p together with miR-210-3p as a promising biomarker for non-small cell lung cancer: a preliminary study. *Cancer Biomark.* 2018; 21:479–88.  
<https://doi.org/10.3233/CBM-170767>  
PMID:29103030
42. Zhang JW, Wang X, Li GC, Wang D, Han S, Zhang YD, Luo CH, Wang HW, Jiang WJ, Li CX, Li XC. MiR-30a-5p promotes cholangiocarcinoma cell proliferation through targeting SOCS3. *J Cancer.* 2020; 11:3604–14.  
<https://doi.org/10.7150/jca.41437>  
PMID:32284757
43. Karvonen H, Perttilä R, Niininen W, Hautanen V, Barker H, Murumägi A, Heckman CA, Ungureanu D. Wnt5a and ROR1 activate non-canonical Wnt signaling via RhoA in TCF3-PBX1 acute lymphoblastic leukemia and highlight new treatment strategies via Bcl-2 co-targeting. *Oncogene.* 2019; 38:3288–300.  
<https://doi.org/10.1038/s41388-018-0670-9>  
PMID:30631148
44. Wang FZ, Zhang MQ, Zhang L, Zhang MC. Long non-coding RNA ROR1-AS1 enhances colorectal cancer metastasis by targeting miR-375. *Eur Rev Med Pharmacol Sci.* 2019; 23:6899–905.  
[https://doi.org/10.26355/eurev\\_201908\\_18729](https://doi.org/10.26355/eurev_201908_18729)  
PMID:31486489
45. Miyake N, Ochi N, Yamane H, Fukazawa T, Ikeda T, Yokota E, Takeyama M, Nakagawa N, Nakanishi H, Kohara H, Nagasaki Y, Kawahara T, Ichiyama N, et al. Targeting ROR1 in combination with pemetrexed in Malignant mesothelioma cells. *Lung Cancer.* 2020; 139:170–78.  
<https://doi.org/10.1016/j.lungcan.2019.10.024>  
PMID:31809978
46. Gentile A, Lazzari L, Benvenuti S, Trusolino L, Comoglio PM. Ror1 is a pseudokinase that is crucial for met-driven tumorigenesis. *Cancer Res.* 2011; 71:3132–41.  
<https://doi.org/10.1158/0008-5472.CAN-10-2662>  
PMID:21487037

## SUPPLEMENTARY MATERIALS

### Supplementary Figure

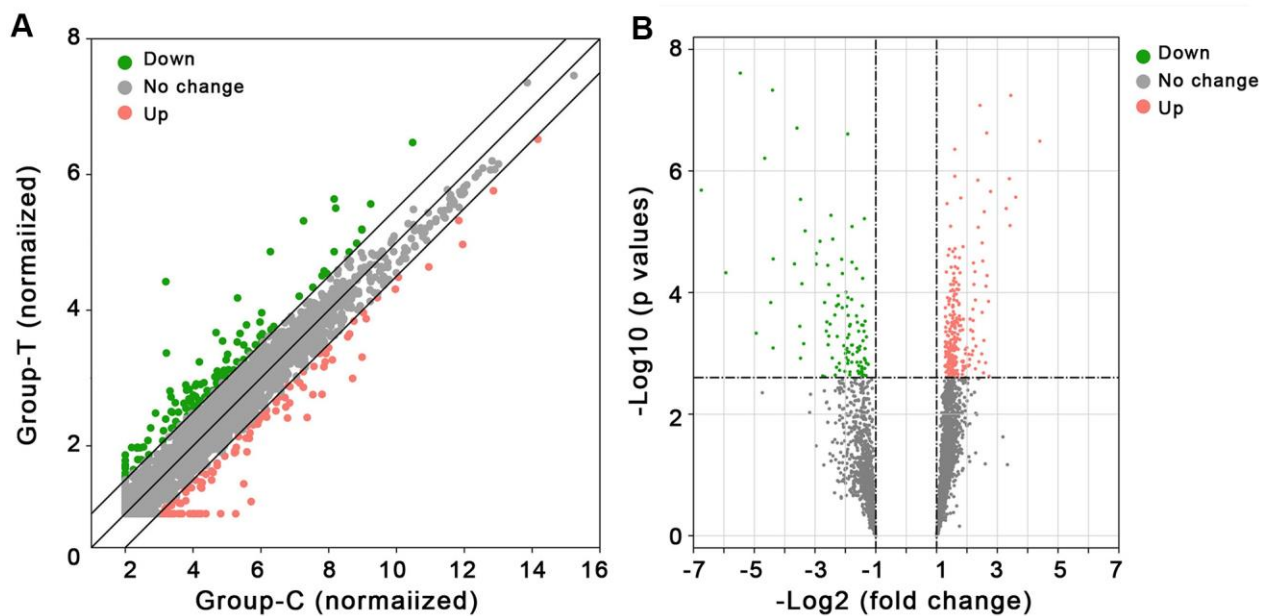

**Supplementary Figure 1. Exosomal circRNA expression profile was established successfully.** (A) Volcano plots were constructed using fold change values and P-values. The values of x and y axes in the scatter plot are the normalized signals of the samples (log<sub>2</sub> scaled). (B) Scatter plot was for assessing the variation of circRNA expression. The vertical lines respectively correspond to 2.0-fold up and down, and the horizontal line represents a P-value of 0.05. The red point in the plot represents the up-regulated expressed circRNAs with statistical significance; the blue point in the plot represents the down-regulated expressed circRNAs with statistical significance.

## Supplementary Tables

**Supplementary Table 1. The clinicopathologic characteristics of enrolled patients for circRNA CHIP.**

|           | <b>Age</b> | <b>Gender</b> | <b>Pathological types</b> | <b>TNM stage</b> | <b>Pathological stage</b> |
|-----------|------------|---------------|---------------------------|------------------|---------------------------|
| Patient 1 | 67         | Female        | Squamous cell carcinoma   | IV               | Low                       |
| Patient 2 | 54         | Male          | Squamous cell carcinoma   | III              | middle                    |
| Patient 3 | 60         | Male          | Squamous cell carcinoma   | IV               | Low                       |
| Patient 4 | 68         | Female        | Squamous cell carcinoma   | IV               | middle                    |
| Patient 5 | 59         | Female        | Squamous cell carcinoma   | IV               | Low                       |

**Supplementary Table 2. Patients' clinicopathologic characteristics (N=58).**

| <b>Characteristics</b>     | <b>Cases (n)</b> |
|----------------------------|------------------|
| <i>Age (Median /years)</i> | 65(42-75) y      |
| <i>Gender</i>              |                  |
| Male                       | 38(65.52)        |
| Female                     | 20(34.48)        |
| <i>Pathological types</i>  |                  |
| Adenocarcinoma             | 0(0.00)          |
| Squamous cell carcinoma    | 58(100.00)       |
| <i>TNM stage</i>           |                  |
| II/ III                    | 25(43.11)        |
| IV                         | 33(56.89)        |
| <i>Pathological stage</i>  |                  |
| High and middle            | 22(37.93)        |
| Low                        | 36(52.07)        |
| <i>EGFR mutation site</i>  |                  |
| 19del/L858R                | 51(87.93)        |
| others                     | 7(12.07)         |
