# Supplementary material for: Tumor-derived exosomal circRNA_102481 contributes to EGFR-TKIs resistance via the miR-30a-5p/ROR1 axis in non-small cell lung cancer
Source: publisher site journal article supplement (doi:10.18632/aging.203011), 2021-05-05
Supplement: Supplementary file [file aging-v13i9-203011-supplementary-material-SD1.pdf]

## SUPPLEMENTARY FIGURE

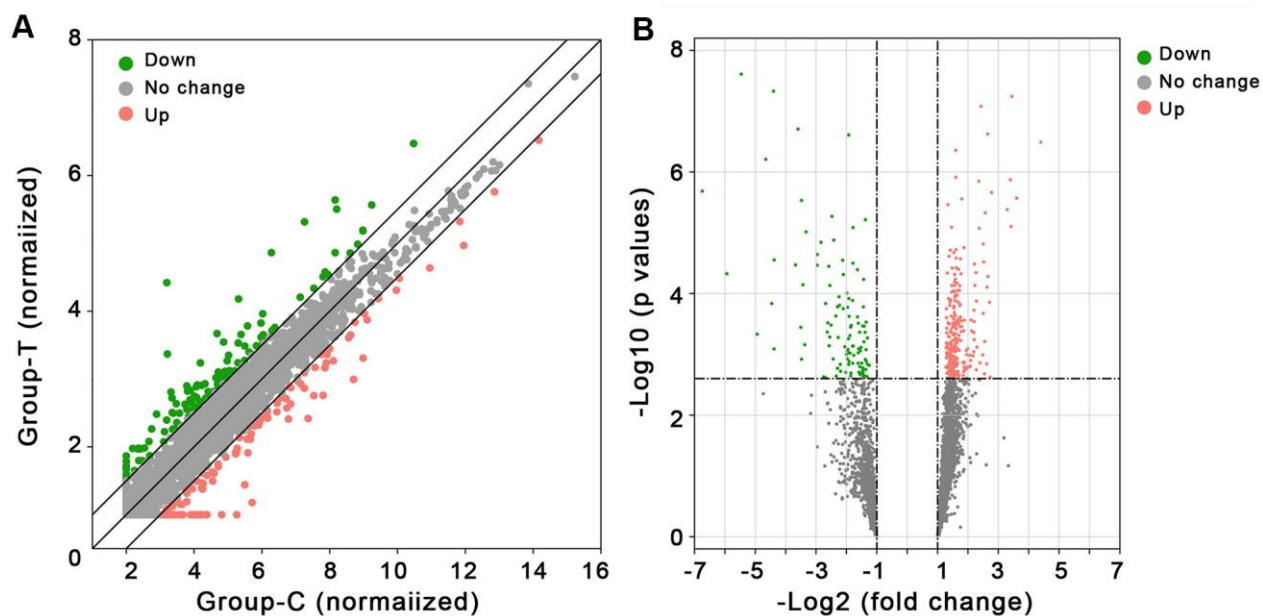

**Supplementary Figure 1. Exosomal circRNA expression profile was established successfully.** (A) Volcano plots were constructed using fold change values and P-values. The values of x and y axes in the scatter plot are the normalized signals of the samples (log<sub>2</sub> scaled). (B) Scatter plot was for assessing the variation of circRNA expression. The vertical lines respectively correspond to 2.0-fold up and down, and the horizontal line represents a P-value of 0.05. The red point in the plot represents the up-regulated expressed circRNAs with statistical significance; the blue point in the plot represents the down-regulated expressed circRNAs with statistical significance.
