# Supplementary material for: Tumor-derived exosomal circRNA_102481 contributes to EGFR-TKIs resistance via the miR-30a-5p/ROR1 axis in non-small cell lung cancer
Source: Aging (Albany NY). 2021 May 5;13(9):13264–86. doi: 10.18632/aging.203011 (PMC8148492; doi:10.18632/aging.203011)
Supplement: Supplementary Tables [file aging-13-203011-s002.pdf]

## SUPPLEMENTARY TABLES

**Supplementary Table 1. The clinicopathologic characteristics of enrolled patients for circRNA CHIP.**

|           | Age | Gender | Pathological types      | TNM stage | Pathological stage |
|-----------|-----|--------|-------------------------|-----------|--------------------|
| Patient 1 | 67  | Female | Squamous cell carcinoma | IV        | Low                |
| Patient 2 | 54  | Male   | Squamous cell carcinoma | III       | middle             |
| Patient 3 | 60  | Male   | Squamous cell carcinoma | IV        | Low                |
| Patient 4 | 68  | Female | Squamous cell carcinoma | IV        | middle             |
| Patient 5 | 59  | Female | Squamous cell carcinoma | IV        | Low                |

**Supplementary Table 2. Patients' clinicopathologic characteristics (N=58).**

| Characteristics            | Cases (n)   |
|----------------------------|-------------|
| <i>Age (Median /years)</i> | 65(42-75) y |
| <i>Gender</i>              |             |
| Male                       | 38(65.52)   |
| Female                     | 20(34.48)   |
| <i>Pathological types</i>  |             |
| Adenocarcinoma             | 0(0.00)     |
| Squamous cell carcinoma    | 58(100.00)  |
| <i>TNM stage</i>           |             |
| II/ III                    | 25(43.11)   |
| IV                         | 33(56.89)   |
| <i>Pathological stage</i>  |             |
| High and middle            | 22(37.93)   |
| Low                        | 36(52.07)   |
| <i>EGFR mutation site</i>  |             |
| 19del/L858R                | 51(87.93)   |
| others                     | 7(12.07)    |
